# Supplementary material for: The complex architecture and epigenomic impact of plant T-DNA insertions
Source: PLoS Genet. 2019 Jan 18;15(1):e1007819. doi: 10.1371/journal.pgen.1007819 (PMC6338467; doi:10.1371/journal.pgen.1007819)
Supplement: S1 Table — (XLSX) [file pgen.1007819.s001.xlsx]

## Sheet: S1 Table - Jupe et al T-DNA
S1 Table: Bionano Genomics and Oxford Nanopore sequencing and assembly statistics.
Oxford Nanopore Minimap/Miniasm					Bionano Genomics optical mapping
Assembly	Col0_CS70000	SAIL_232	SALK_059379			# molecules	avg size	# cmaps	cmap N50	avg depth
# contigs (>= 0 bp)	40	59	139		Salk_059379	229043	203	174	1.032	83
# contigs (>= 1000 bp)	40	59	139		Wiscseq_DsLox449D11	260856	288	160	1.006	45
# contigs (>= 5000 bp)	40	59	114		SAIL_232	294734	192	159	1.068	54
# contigs (>= 10000 bp)	39	59	92		Salk_075892	148441	201	167	0.972	63
# contigs (>= 25000 bp)	37	56	79
# contigs (>= 50000 bp)	36	50	67
Total length (>= 0 bp)	119203081	119166865	119127857
Total length (>= 1000 bp)	119203081	119166865	119127857
Total length (>= 5000 bp)	119203081	119166865	119029013
Total length (>= 10000 bp)	119193837	119166865	118887259
Total length (>= 25000 bp)	119149395	119121008	118664431
Total length (>= 50000 bp)	119111081	118911227	118214245
# contigs	40	59	139
Largest contig	16115063	16070966	8784268
Total length	119203081	119166865	119127857
GC (%)	36	36	36
N50	7583936	9344018	3101444
N75	3741498	3251721	2155294
L50	6	5	13
L75	11	11	24
# N's per 100 kbp	0	0	0
