# Supplementary material for: The complex architecture and epigenomic impact of plant T-DNA insertions
Source: PLoS Genet. 2019 Jan 18;15(1):e1007819. doi: 10.1371/journal.pgen.1007819 (PMC6338467; doi:10.1371/journal.pgen.1007819)
Supplement: S3 Table — (XLSX) [file pgen.1007819.s003.xlsx]

## Sheet: S3 Table - Jupe et al T-DNA
S3 Table: Identification of 'N' regions in the TAIR10 reference genome and the corresponding Col-0 ONT contigs.
	Chr	start N-stretch	end N-stretch	Length N-stretch	Actual length	overlap/fill sequence	ONT Contig
1	Chr1	13201253	13201352	100	-4	TACC	contig_20
2	Chr1	13993096	13993195	100	-8	ACTTAATG	contig_20
3	Chr1	14309682	14309741	60	6903	GTTTTTAAAGGTCTTCTTGTAAATTCTTTAAAAATCTTATAAAAACTATTGAATATCTTTTAAAACCCTTTAAACCTTTTAAAAATCTCTTGTAAATCTTCTAAATCTCTTTTAAAATCCCTTGTAAATATTTTAAAACACTTTTAAAATCAGTTGTAAATAATTTAAAACCCTTTTAAAACAATTTTAAACCCTTTAAAAATCTTCAAAAAACCTTTGTAAATCTTTTAAAGCCCTTTAAAATCCGGGTTGGCTGATTTTATAGCCATAAACTAATTGCATTCTCAACTTTTTCCCCCATACTTTTTGCCTCTTAAATTTCCACCATAAACTTTGATAATTCTTTAAATTACAACATGTACTTTCGGATTCATCCTTAAACATACATTTCCAATTGAA…	contig_9
4	Chr1	14511722	14538721	27000	cen/0	cen	contig_9
5	Chr1	14545722	14581719	35998	cen	cen	contig_9
6	Chr1	14610669	14656720	46052	cen	cen	contig_9
7	Chr1	14656857	14656857	1	cen	cen	contig_9
8	Chr1	14664123	14664123	1	cen	cen	contig_9
9	Chr1	14685673	14685703	31	cen	cen	contig_9
10	Chr1	14723226	14723243	18	cen	cen	contig_9
11	Chr1	14733476	14733502	27	-753	ATTGTGAAACATTTTGACCATAAAAACACTAACAAAACTGGTTAGTGCTTTTAAGCAATTTTTTGTTGGTTTTACTCTGTTTTAGGAGAAAATAGGTATAAGTGTTGTCTAAACACTCCTAATCCATCTCTAACTCTTAAAATTAGTTAAAGGTTTTGAATTGTGACAAATTTTGACCATAGAAACACTAACAAAGCTATTTACTGCTTCTAAGTTATTTTTTGTTGGTTTTAGCCTCTTCTGGGAGAAAATGGGTATAAGTGTTGTCTAAACACTCCTAATTCATCTCTAACTCTTATAATTAGTCAAATGCATTGGATTGTGACACATTTTGACCATAAAAACACTAACAAAACTGTTCACTGCTTTTAAGCAATTTTTTGTTGGTTTTAGTCTGTT…	contig_9
12	Chr1	14750971	14803970	53000	cen	cen	contig_9
13	Chr1	14818661	14818661	1	cen	cen	contig_9
14	Chr1	14836959	14836962	4	cen	cen	contig_9
15	Chr1	14859918	14859921	4	cen	cen	contig_9
16	Chr1	15086046	15087045	1000	cen	cen	?
17	Chr1	15322900	15322959	60	-84	TTGATGGTGTAACCTAAGTCCGTATGATTTTTGGTTTTGGATCTTCTAACAGGGAAAGATAAATTTAGGTTCATAGCCCTGGTT	contig_27
18	Chr1	15326837	15326896	60	3526	TGGACAACAAAAACACAAACCAAGCTTCTTCATGATTCTCAAAGCTTTGATGGTGAACCCGAAGTTCTTAACAGTTTTTGGTTTTGAATCATATAAAAAGGAAGTACTACTTTACTCTTCGGGATCTCGTTGAGGTTCTAGTTTTATATTCAATCATACACATGACATATACTCATATTTCACTCCGAAATGCTAACCCAGATTTTTCGTGCTCTTCAAAGCTTTGATGGTGTAACCTAAGTCTGTATGATTTTTTGTTTTGGATCTTCTAACAGGGAAAGATAAATTTAGGTTCATAGCCCTGGTTGGGGTTTTAGCCCTAAAACTCAATCATCCACCTATCATCTTGAGATATTTGATTCCAAAACGCTTACAAAGATTGTGCTTACTTGTTAAAAT…	contig_27
19	Chr1	15345855	15346565	711	449	CCAAACTTTAAAACCCAAGTCCTACTTTAGGCTTCCGGAATCCGGTTGCGGTTCTAGTTTTTATGCTCAATGATACACAAAGCATCTAGTCATATTTGACTACAAATTCGCTAACCTAGCTTATTCTTGATTCTCAAAGCTTTGATAGTGAAGCCGAATTCTTATGAGTTTTTGGTTTTGAACAGTTTAAAAGGTAGCACTACTTTACTTTCCGGGATCTAGTTGAGGTTCTAGTTTTATATTCAATCATACACATAACATCTAGTCATATTTAACTCTGAAACGCTAACCTAGATTCTTTTTGCTTCTTAAAGTATTAAATATATTTGCTCTTAAACACTAAACATAAACCCTACACCCTAAATCCCAAACCCTAAAATCTAATCCCTAAACCCTAAA…	contig_27
20	Chr1	15396128	15396187	60	81	AACCGGATTCCGTAAGCCTAAAGTAGGATTTAGGTTTTAAAGTTTGGGATCTATGGTTTAGGGTTTAGGGTTTAGGTTTAA	contig_5
21	Chr1	15411045	15411104	60	561	ATTTAGGGTTCAAGGGTTAGGGTTTAGGGGTTGGATTTTAGGTTTTGGGATTTAGGGTGTAGAGTTTTGGTTTAGTGTTTAGGATCAAATATAGCATGATACTTAGAGAAGCAAGAAGAATCTTGGTTAGCGTTTCAGAGTGAAATATGACTAGATGTCATGTGTATGATTGAATATAAAACTAGAACCTCAATGAGATCCCGAAAAGTAAAGTAGTGCTTCCTTATTATACGATTAAAAACCAAAAACTCATAAGATCTTTGACTTCACCATCAAAGCTTTGAGAATCAAGAAGTGGCTTGGTTAGCGGATTTATAGCCAAATATGACTAGATGCTTTGTGTATCGTTGAGCATAAGAACTAGAACCGCAATAGGCTTCCAGAAGCTAAAGTAGGATT…	contig_5
22	Chr1	17639369	17639468	100	-9	GGCAAAGCC	contig_10
23	Chr1	28537490	28537589	100	-5	AAGCA	contig_18
24	Chr2	1	1000	1000	?	?	?
25	Chr2	3607930	3608929	1000	cen	cen	?
26	Chr2	3611839	3611883	45	2228	TCTTGTGAAGAGCGAACTCAACACTTAGATTTCACCGAAATGAATATATTTTTCCAAGAGGTGGAACTTGGAAAAATCTTTGAGGGATGAAATCTAGTCTTGTGAAGAGCGAACTCAACACTTAGATTTTGCTGAAATGAATATATTTTTCAAAAAGGTGGAACTTGGAAAAATCCTTGAGGGATGAAATCAAGTCTTGTGAAGAGCGAACTCAACACATGGATTTCACCGAAATGATTATATTTTTTCAAGAGGTGGAACTTGGAAAACTCTTTGAGGGGTGAAATCTAGTCTTGTGATGATCAAGTTAAACACTTAGATTTCATCGAAATAAATATATTTTTCCGAGAGGTGGAACTGAAAGAGGTGGAACTTGGAAAATGAATATATTTTTGAGGA…	contig_3
27	Chr2	3614872	3614916	45	cen	cen	?
28	Chr2	3617845	3617944	100	cen	cen	?
29	Chr2	3626547	3626591	45	cen	cen	?
30	Chr2	3629818	3629862	45	-550	GATGAAATCTAGTCTTGTGAAGAGTGAACTCAACACTTAGATTTCACCGAAATGAATATATTTTTCCAAGAGGTGGAACTTGGAAAAATCCTTGAGGGATGAATTCTAGTCTTGTGAAGTGCGAACTCAACACTTAATATTTCACTTAAATGAATATATTTTTCCGAGAGGTGGAACTTGGAAAAATCCTTGAGAGATAAAATCTAGTTTTGTGAAGAGCAAACTCAACACTTAGATTTCACCAAAATGAATATATTTTTCCAAGAGGTGGAACTTGGAAAAATCCTTGACGGATGAAATCTAGTCTTGTGAAGCGCAAACTCAACACTTAGATTTCACCGAAATGAATATATTTTTCCAAGAAGTGCAACTTGGAAAAATCCTTGAGGGATGAAATCT…	contig_3
31	Chr2	3633379	3633423	45	3628	TTTTCCGAGAGGTGGAACTTGAAAAAATCCTTGAGGGTTGAAATCTAGTCTTGCGAAGAGCGAACTCAACACTTAGATTTCACCAAAATGAAATATATTTTTAAAAGATTTGGAACTTGGAAAAGTCCTTGAAGGATGAAATCTATTTTTGTGAACAGCGAGCTCAACACTTAGATTTCACCGAATTGAATATAATTTTCCAAAATGTGGAACTTGGAAAAACTTTTGAGGGATGAAATCTAGTCTTGTGAAGAGCAAGCTCAACACTTAGATTTCACCGAAATGAATATATTTTTTTCCGAGAGGTGGAACTTGGAAAATCTTTGAGGGGTCAAATCTAGTCTTGTGAATTGCGAACTCAACACTTAATATTTCACCGAAATGAATATATTTTTCCGA…	contig_3
32	Chr2	5201883	5201942	60	39263	TGGTGGCTGGTTTGATATATCATAATAACATATGGTATCTCATAACTCGGCCAAAACACGAAATCTTATTGCATAACTCAGCCGTAACGTTATATTTTATTCCACGTCAAACAGAAAATTTGATTATTGGAGGGTTTAGTTAAGGAATAATTTCAACTCGGTTGAATTATTTTGAATATTGACGTGTTCGTGTATCCATGAAATCAATCATTTGCGGTTCCTTATTAACTCATTTTTAATCTCGAGAAAACATAATAATTGTTTCTCGATAAACTCAGCAAAAAAAACATAGCAATATTCTGACTGATTTGATGACATCGATCAACCAACAATAATGCTTGTATTCAAATCTCATAATAACATTTGGTTTTCTTATGTAGTTCGAACAATTGAAATCTT…	contig_3
33	Chr2	7492720	7492720	1	1	C	contig_3
34	Chr3	1	100	100	?	?	?
35	Chr3	9171883	9171982	100	-8	AGCTTAGT	contig_12
36	Chr3	11354160	11354259	100	6	GAGGAT	contig_12
37	Chr3	13022637	13022736	100	-2	TC	contig_12
38	Chr3	13587787	13588786	1000	cen	cen	?
39	Chr3	13589757	13589816	60	cen	cen	?
40	Chr3	13687768	13687817	50	-993	AAAAAAGAGGGATGCAACACGAGGACTTTCCGGGAGGTCACCCATCCTAGTACTACTCTCTCCCAAGCACCCTTAACTGCGGAGTTCTGATGGGATCTGGTGCATTAGTGCTGGTATGATCGCATCTGTTACTACATGCAATGCAATCGTATCTATTCTTTTTTGAAGACTTTATGATCCATTTGCCGTGGGTCCCACCAGCTATGTAGGAATACCCTATCTTGTTTATAAGAGCTTTGATACATGCAAAATATTCGAAAACAATGTCCGAACATATAATTTTTCGCCCCGTAATATAGCAAAGATCACGAAAAAGCCAGAAAAACTACATTAAGGTCAAAATTTGGAGTAGAAAAAAAAACAATATAAGAATTCCATTTTCCTTCCTCATTCATGGGA…	contig_2
41	Chr3	13696725	13696774	50	cen	cen	contig_2
42	Chr3	13696915	13696915	1	cen	cen	contig_2
43	Chr3	13696962	13696962	1	cen	cen	contig_2
44	Chr3	13697000	13697000	1	cen	cen	contig_2
45	Chr3	13701219	13701219	1	cen	cen	contig_2
46	Chr3	13701383	13701432	50	cen	cen	contig_2
47	Chr3	13701711	13701711	1	cen	cen	contig_2
48	Chr3	13701768	13701768	1	cen	cen	contig_2
49	Chr3	13701832	13701832	1	cen	cen	contig_2
50	Chr3	13701842	13701842	1	cen	cen	contig_2
51	Chr3	13701856	13701856	1	cen	cen	contig_2
52	Chr3	13701908	13701908	1	cen	cen	contig_2
53	Chr3	13704772	13704821	50	-739	ACGATTACATTGCATGTAGTAACAGATGCGATCATACCAGCACTAATGCACCGGATCCCATCAGAACTCCATAGTTAAGGGTGCTTGGCGAGAGTAGTACTAGGATGGGTGACCTCCCGGAAAGTCCTCGTGTTGCATCCCTCTTTTTGTTTTTCTCTATTTTGTTTTGTTAAAAATGTATGACTCTATAACTTTTAGACCGTGAGGCCAAACTTGGCATGTGATACCTTTTCGGAAAGCCCAAAGAGAGCTCTCCGATGAATGAGGAAGGAAAATGGAATTCTTCTATTGTTTTTTTTTCTACTCCAAATTTTGAACTAAATGTACTTTTTCGGGCCTTTTCGTGATCTTTGCTATATTACGGGGGGAAAATTATATGTTCGGACATTGTTTTCCAAT…	contig_2
54	Chr3	13704854	13704854	1	cen	cen	contig_2
55	Chr3	13718469	13718518	50	-434	ACCTTTTCGGAAAGCCCAAAGAGAGCTCTCCGATGAATGAGGAAGGAAAATGGAATTCTTCTATTGTTTTTTTTTCTACTCCAAATTTTGAACTAAATGTACTTTTTCGGGCCTTTTCGTGATCTTTGCTATATTACGGGGGGAAAATTATATGTTCGGACATTGTTTTCCAATATTTTGCATGTATCAAAGCTCTTATAAAGAAGATAGGGTATTCCTACATAGCTGGTGGGACCCACGGCAAATGGATCATAAAGTCTTTAAAAAAGAATAGATACGATTACATTGCATGTAGTAACAGATGCGATCATACCAGCACTAATGCACCGGATCCCATCAGAACTCCGCAGTTAAGGGTGCTTGGCGAGAGTAGTACTAGGATGGGTGACCTCCCGGAAA…	contig_2
56	Chr3	13726060	13726109	50	cen	cen	contig_2
57	Chr3	13726137	13726137	1	cen	cen	contig_2
58	Chr3	13735830	13735879	50	-982	AAAAGAGGGATGCAACACGAGGACTTTCCGGGAGGTCACCCATCCTAGTACTACTCTCTCCCAAGCACCCTTAACTGCGGAGTTCTGATGGGATCTGGTGCATTAGTGCTGGTATGATCGCATCTGTTACTACATGCAATGCAATCGTATCTATTCTTTTTTGAAGACTTTATGATCCATTTGCCGTGGGTCCCACCAGCTATGTAGGAATACCCTATCTTGTTTATAAGAGCTTTGATACATGCAAAATATTCGAAAACAATGTCCGAACATATAATTTTTCGCCCCGTAATATAGCAAAGATCACGAAAAAGCCAGAAAAACTACATTAAGGTCAAAATTTGGAGTAGAAAAAAAAACAATATAAGAATTCCATTTTCCTTCCTCATTCATGGGAGA…	contig_2
59	Chr3	13744450	13744549	100	cen	cen	?
60	Chr3	13749629	13749629	1	cen	cen	contig_2
61	Chr3	13749722	13749821	100	cen	cen	contig_2
62	Chr3	13752054	13752103	50	cen	cen	contig_2
63	Chr3	13757496	13757545	50	cen	cen	contig_2
64	Chr3	13766413	13766413	1	cen	cen	contig_2
65	Chr3	13766490	13766539	50	cen	cen	contig_2
66	Chr3	13785544	13785593	50	cen	cen	contig_2
67	Chr3	13785640	13785640	1	cen	cen	contig_2
68	Chr3	13789583	13789583	1	-1003	TTATAGAGTCATATATTTTTAACAAAACAAAAAGAGAAAAACCGAAAAAAGAGGGATGCAACACGAGGACTTTCCGGGAGGTCACCCATCCTAGTACTACTCTCTCCCAAGCACCCTTAACTGCGGAGTTCTGATGGGATCTGGTGCATTAGTGCTGGTATGATCGCATCTGTTACTACATGCAATGCAATCGTATCTATTCTTTTTTGAAGACTTTATGATCCATTTGCCGTGGGTCCCACCAGCTATGTAGGAATACCCTATCTTGTTTATAAGAGCTTTGATACATGCAAAATATTCGAAAACAATGTCCGAACATATAATTTTTCGCCCCGTAATATAGCAAAGATCACGAAAAAGCCAGAAAAACTACATTAAGGTCAAAATTTGGAGTAGAAA…	contig_2
69	Chr3	13790201	13790250	50	cen	cen	contig_2
70	Chr3	13790801	13790801	1	cen	cen	contig_2
71	Chr3	13798795	13798795	1	cen	cen	contig_2
72	Chr3	13799418	13800417	1000	cen	cen	contig_2
73	Chr3	13844734	13844793	60	cen	cen	contig_2
74	Chr3	13847074	13847133	60	cen	cen	contig_2
75	Chr3	13848488	13848547	60	cen	cen	contig_2
76	Chr3	13851643	13851643	1	cen	cen	contig_2
77	Chr3	13852265	13852324	60	2693	TTAAAAATGTATGACTCTATAACTTTTAGACCGTGAGGCCAAACTTGGCATGTGATACCTTTTCGGAAAGCCCAAAGAGAGCTCTCCGATGAATGAGGAAGGAAAATGGAATTCTTCTATTGTTTTTTTTTCTACTCCAAATTTTGACCTTAATGTACTTTTCCAGGCCTTTTCGTGATCTTTGCTATATTATGGGGCGAAAATTATATGTTCGGACATTGTTTTCGAATATTTTGCATGTATCAAAACTCTTATAAACAAGATAGGGTATTCGAACATAGCTGGTGGGACCCACGGCAAATGGATCATAAAGTCTTCAAAAAAGAATAGATACGATTGCATTGGATGTAGCAACAGATGCATTCATACCAGCATTAATGCACCGGATCCCATCAGAAA…	contig_2
78	Chr3	13855570	13855629	60	3691	GAGTGCTTGGGCGATAGTAGTACTAGGATGGGGGACCTCTAGGAAAGTCTCGTGTTGCATCCCTCTTTTTGGTTTTCTTTTTTTTTTTTGTTAAAAATGTATGACTCTATAACTTTTAGACCGTGAGGCCAAACTTGGCATGTGATACCTTTTCGGAAAGCCCAAAGAGAGCTCTCCGATGAATGAGGAAGGAAAATGGAATTCTTCTATTGTTTTTCTACTCCAAATTTTGACCTTAATGTACTTTTTCGGGCCTTTTCGTGATCTTTGCTATATTACGGGGCGAAAATTATATGTTCGGACATTGTTTTCGAATATTTTGCATGTATCAAAGCTCTTATAAACAAGATAGGGTATTCCTACATAGCTGGTGGGACCCACGGCAAATGGATCATAAAG…	contig_2
79	Chr3	13856983	13857042	60	-399	CTTTTTTTTTCGGTTTTTCTCTTTTTTTTTTGTTAAAAATGTATGACTCTATAACTTTTAGACCGTGAGGCCAAACTTGGCATGTGATACCTTTTCGGAAAGCCCAAAGAGAGCTCTCCGATGAATGAGGAAGGAAAATGGAATTCTTCTATTGGTTTTTTTTTCTACTCCAAATTTTGACCTTAATGTACTTTTTCATGCCTTTTCGTGATCTTTGCTATATTACAGGGCGAAAATTATATGTTCGGACATTGTTTTCGAATATTTTGCATGTATCAAAGCTCTTATAAACAAGATAGGGTATTCCTACATAGCTGGTGGGACCCACGGCAAATGGATCATAAAGTCTTCAAAAAGAATAGATACGATTGCATTGCATGTAGTAACGGATGCGATCAT	contig_2
80	Chr3	13858680	13858739	60	cen	cen	contig_2
81	Chr3	13862298	13862357	60	cen	cen	contig_2
82	Chr3	13867025	13867025	1	cen	cen	contig_2
83	Chr3	13867052	13867052	1	cen	cen	contig_2
84	Chr3	13867062	13867121	60	cen	cen	contig_2
85	Chr3	14132987	14133046	60	cen	cen	contig_2
86	Chr3	14133462	14133462	1	cen	cen	contig_2
87	Chr3	14134681	14134740	60	2458	GCAAAACCGCCGGATTACACTCCAAAAAAAGGAAGGAATCAAGAAACCCGGTTTCCATCCACAGGTGAGAAGCGCCGAAAGAAGACAAATAACAAAGCTACGCGTGGCATCAACTTGGAGAGGTGGTTGCAGCCTGAAACCAATGATGATTGACGTTAACTCGTCAACTAGTACAAGGAGTTCAACTACGATAAAGTCTTTGTGTGTAAATTTGTGTTTCTCGGAATTGTCAAATATTGTTCGACAGGTTCAATTAAGAACAATCCTTTGTGTTTAAATTTGTGTTTTCGGAATTTTTAAGCATAGTTAAGTTTTTTAATTCAACAGAATTGCCAAACATAGTTCAACAGGTTCAACTACGAACCAGTCGTTGTTTGGCAAACCTAGTACAACAGGTTC…	contig_2
88	Chr3	14136580	14136580	1	cen	cen	contig_2
89	Chr3	14136624	14136683	60	2025	TTTTTTGTAATTTATAAGCCCATTAAAGATGGCAAAAGACCCAAAACGGATACTTATTTTAGGGATGCTACAACCCCTAGTAAACGAAAGGCCTAAGCCCAACCCATTTTCTTAATCGTTCGGCGTCAAAGTTCAGATGAGACAGCCGAAGAGTCATGTCTATTCAATTTACTCGTTTGCTTTTAATTTTACACGAAACCAGAGAATTCAAGAAATTGAAACTGTTCACCGGTGAACTACATGGCTCATCGCCGGAGCATTCAGAGAGTAAGAACGTCGGCGCCTTCCTCTCCTGCGTCTCCGACTCCAACATCACTGGATTGTTCTTCTCCACCACCACCTGAGTAGTTAGTTGACATCGAGATAATTTGCCGACATTTGGGGGTTCCGCTTCACCGT…	contig_2
90	Chr3	14136716	14136716	1	cen	cen	contig_2
91	Chr3	14138185	14138244	60	4580	CGTCTGGTGGTTAGGCTCCTGAGGGATGTGGAATATATGCTTGAACTGATCGTGTCTTTTGAACCATACAACTTCTTCTTTAAACTTCCTCTCTATCAGTTCAACTGTCTGCGTGACCTGGCACCTACTGCTTATCTTGCACACTTTGCCGTATTCTGAAAAAGGAAAATGCATGGTCTGTGGCGGCAGTGGCTGAGAATCTAAATCATCATCCTCCAAACCATCATTGCCAGCCTCATCTTCCTCTGTCTCTTTAACAGAAACCTCATCATCCTCGGCCTCACAAGTATCCTGCAAATTCAATAAACATTAACCAATTGAAGAATTCATATGTACCAAACTAATAATTCATATGTACCAATTGAACTAGTTCCATCAAATTACTTAAATCAAACATGT…	contig_2
92	Chr3	14139912	14139971	60	2999	TGCCGCAGTGTTTCTCCTGCGACTTTCTATTCACTTTCAAGTATTTGATATTCACTTTCAAGTAGTTATCATGTTTTCAATCGTTGCTTTGCTATTGTCTTTGATTATGTCTCAGTAGTGAACCGTATTTCTGATGATGAGATAGAGTAGTTGTGGTTTACTTGGTCGTTTTAGGTGGTTGAGTTTAGAATACTAGAATCCCTTCTAGATTAGTTGCGCTTATTGCTTGTTTCACTGGCTAATGTGGAATATGAATCCAGACATTCCCGCGCTCAAAAGGTGTTCGATAGAATGTCAGATCTATTAATTCCAGAGATATTCGCCTCTACCCCAAGGGATTGGCTTGTAGAGAAGGTATTGGCTTTAATAAGTTGATTCGATATTGCCTGCTTAGTTAGA…	contig_2
93	Chr3	14141569	14141628	60	6572	CCGCTAAAAGTAAAGCCTCGATTCTTCTCTCTTCCTCTTAAACTTGTTTCAGTTAAATCGTTTAGTTCGTTAGAAGATCCAGCATGTTTATTAAGCTTAGAATTGCTTAGGATTTGAACAGGCTGTTTTAGGACATGATTCCTTATCGGTTTCTCAGATTTTCAACTTTGATTTTGAAGAAATTCATCGTTTTAACCACCGGTTTCTCTTTCACCGCCTGTAATCCGTCATCTGTCGTCGAGCCTACCGGCGCTCTGAACTGCTAACCACCGGATTCCGGTGATAATTTATTGAGTGTTCTTCAGATTTTGGGAAGATCTTCAACATGTTCTTGAGCCAAAAACTTCCCAGACCTTCCTCACCATCCGCGACACGATTTCGCAGTGTTAATTATGCCTC…	contig_2
94	Chr3	14173690	14173749	60	cen	cen	contig_2
95	Chr3	14178038	14178097	60	cen	cen	contig_2
96	Chr3	14183958	14184017	60	cen	cen	contig_2
97	Chr3	14188120	14188179	60	805	CCTTCCTCATTCATCGGAGAGCTCTCTTTGGGCTTTCCGAAAAGGTATCACATGTCAAGTTTGGCCTCACGGTCTTAAAGTTATAGAGTCATACATTTTTAACAAAACAAAAAGAGGGATGACACACGAGGACTTTCCTGGAGGTCACCCATCCTAGTACTACTCTCGCCCAAGCACGCTTAACTGCAGAGTTCTGATGGGATCTGGTGCATTAGTGCTGGTATGATCGCATCCGTAACTACATGCAATGCAATCGTATCTATTCTTTTTTGAAGACTTTATGATCGATTTGCCGTGGGTCCCACCAGCTATGTAGGAATACCCTATCTTGTTTATAAGAGCTTTGATACATGCAAAATATACGAAAACAATGTCCGAACATATAATTTTTGCCCCGTA…	contig_2
98	Chr3	14189477	14189536	60	cen	cen	contig_2
99	Chr3	14191600	14191659	60	cen	cen	contig_2
100	Chr3	14192809	14192868	60	cen	cen	contig_19
101	Chr3	14205201	14205260	60	cen	cen	?
102	Chr3	14208953	14209952	1000	22674	CTATTCTTTTTTGAAGACTTTATGATCGATTTGCCGTGGGTCCCACCAGCTATGTAGGAATACCCTATCTTGTTTATAAGAGCTTTGATACATGCAAAATATACGAAAACAATGTCCGAACATATAATTTTTGCCCCGTAATATAGCAAAGATTACGAAAAGGCTCGAAAAAGTACATTAAAATCAAAATTTGGAGTAGGAAAAAAACAATAGAAGAATTCCATTTTCCTTCCTCATTCATCGGAGAGCTCTCTTTGGGCTTTCCGAAAAGGTATCACATGTCAAGTTTGGCCTCACGGTCTTAAAGTTATAGAGTCATACATTTTTAACAAAAAAAAAGAGAAAAACCAAAAAAAAAGAGGGATGACACACGAGGACTTTCCTGGAGGTCACCCACGC…	contig_2
103	Chr3	15132295	15132545	251	20010	AAATGAGGTATTTTTTTTCTTACCAAAAAGGTGGGGTATTAGAATTCCAAAAGTAAATAGATTGAGTATTTTTGGCTATTTTACTGTTATAATTTAACGTTTTTTATTGATACTGTAACGTCTGTTAAATCAGAGGTTTGAATTTATCAATAATTTAAAGATATGGTATTTTTCGACCAAATAGAATTAACTGAGGTATTTTTCTTTCAACAAAAAGAAGTTAGGTATTAAACGTCCAAATAAAAAATAAATGAGGTATTTTCAGATTTTTTTCCTTTGATAAAACACTCATTAATTTTCTATCTTAATTTTTTTTATTAGGAGTGAAAGTGAAAGAAAAAACCCTTTAAAACTTGAGTATCGATTCTACAAGATCATCCATGTTTTTCAGATTAATTT…	contig_2
104	Chr4	1	999	999	?	?	?
105	Chr4	1	1000	1000	?	?	?
106	Chr4	3053302	3054301	1000	cen	cen	?
107	Chr4	3133664	3133674	11	38	GTTGACCCAACTCATTTTGTTAAATGGGTTGGGTCAAC	contig_21
108	Chr4	3956022	3957021	1000	cen	cen	?
109	Chr4	3974423	3974430	8	cen	cen	?
110	Chr4	3984060	3984070	11	cen	cen	?
111	Chr5	10131132	10131132	1	1	A	?
112	Chr5	11194470	11194470	1	cen	cen	?
113	Chr5	11194473	11194474	2	cen	cen	?
114	Chr5	11194503	11194503	1	cen	cen	?
115	Chr5	11194511	11194512	2	cen	cen	?
116	Chr5	11194538	11194848	311	cen	cen	?
117	Chr5	11202874	11202875	2	cen	cen	?
118	Chr5	11202930	11202930	1	cen	cen	?
119	Chr5	11203129	11203439	311	cen	cen	?
120	Chr5	11210702	11210702	1	cen	cen	?
121	Chr5	11210918	11210955	38	cen	cen	?
122	Chr5	11211027	11211337	311	cen	cen	?
123	Chr5	11217044	11217044	1	cen	cen	?
124	Chr5	11218092	11218402	311	cen	cen	?
125	Chr5	11222909	11222937	29	cen	cen	?
126	Chr5	11222968	11222970	3	cen	cen	?
127	Chr5	11222979	11222979	1	cen	cen	?
128	Chr5	11223012	11223322	311	cen	cen	?
129	Chr5	11225965	11225965	1	cen	cen	?
130	Chr5	11226366	11226366	1	cen	cen	?
131	Chr5	11226379	11226379	1	cen	cen	?
132	Chr5	11226421	11226421	1	cen	cen	?
133	Chr5	11226435	11226435	1	cen	cen	?
134	Chr5	11226445	11226446	2	cen	cen	?
135	Chr5	11226508	11226508	1	cen	cen	?
136	Chr5	11226522	11226621	100	cen	cen	?
137	Chr5	11228287	11228387	101	cen	cen	?
138	Chr5	11228759	11228858	100	cen	cen	?
139	Chr5	11235648	11235648	1	1	G	?
140	Chr5	11710529	11710560	32	cen	cen	?
141	Chr5	11723181	11723210	30	cen	cen	?
142	Chr5	11725026	11726023	998	cen	cen	?
143	Chr5	12827449	12828448	1000	cen	cen	?
144	Chr5	12829009	12832167	3159	cen	cen	?
145	Chr5	12832335	12832335	1	cen	cen	?
146	Chr5	12834675	12837834	3160	cen	cen	contig_4
