# Supplementary material for: The complex architecture and epigenomic impact of plant T-DNA insertions
Source: PLoS Genet. 2019 Jan 18;15(1):e1007819. doi: 10.1371/journal.pgen.1007819 (PMC6338467; doi:10.1371/journal.pgen.1007819)
Supplement: S4 Table — (XLSX) [file pgen.1007819.s004.xlsx]

## Sheet: S4 Table - Jupe et al T-DNA
S4 Table: Optical maps identify misassembled regions in ONT contigs as 'False Duplications' or 'False Deletions'.
Line	ONT_contig	BNG_cmap	TAIR_start	TAIR_end	Difference	FLAG	Type
SALK_059379	contig_30	61	712136	722887	8542	False Duplication	overassembled
SALK_059379	contig_2	55	1527867	1586443	18831	False Deletion	Repeat
SALK_059379	contig_13	10	402758	442047	16892	False Deletion	Repeat
SALK_059379	contig_13	10	1596042	1657556	59328	False Deletion	Repeat
SALK_059379	contig_13	10	1691058	1698951	5965	False Deletion	Repeat
SALK_059379	contig_35	100	829096	855184	13475	False Deletion	Repeat
SALK_059379	contig_35	86	1384444	1457005	73669	False Deletion	Repeat
SALK_059379	contig_42	68	286018	323035	44452	False Deletion	Repeat
SALK_059379	contig_48	58	1176796	1178195	66125	False Deletion	Repeat
SALK_059379	contig_48	58	1185351	1189564	39997	False Deletion	Repeat
SALK_059379	contig_48	58	1359319	1408826	6494	False Deletion	Repeat
SAIL_SEQ_232	contig_7	92	2023910	2057725	6705	False Deletion	Repeat
SAIL_SEQ_232	contig_16	68	14471397	14511886	39898	False Deletion	Repeat
SAIL_SEQ_232	contig_33	28	1756274	1765043	7851	False Deletion	Repeat
Col-0	contig_12	79	5727333	5784538	8152	False Duplication	Repeat
Col-0	contig_3	36	14493390	14561644	12499	False Deletion	Repeat
Col-0	contig_3	97	16087391	16099496	8843	False Deletion	Repeat
Col-0	contig_4	55	75884	78041	128024	False Deletion	Repeat
Col-0	contig_4	55	938627	1014837	73423	False Deletion	Repeat
Col-0	contig_4	55	1544709	1570571	15183	False Deletion	Repeat
Col-0	contig_9	17	83971	140486	55900	False Deletion	Repeat
Col-0	contig_12	10	8709732	8730151	5353	False Deletion	Repeat
Col-0	contig_13	4	1523970	1573191	8219	False Deletion	Repeat
Col-0	contig_19	12	104146	196714	31029	False Deletion	Repeat
Col-0	contig_21	81	626286	681813	27051	False Deletion	Repeat
