# Supplementary material for: The complex architecture and epigenomic impact of plant T-DNA insertions
Source: PLoS Genet. 2019 Jan 18;15(1):e1007819. doi: 10.1371/journal.pgen.1007819 (PMC6338467; doi:10.1371/journal.pgen.1007819)
Supplement: S6 Table — (XLSX) [file pgen.1007819.s006.xlsx]

## Sheet: S6 Table - Jupe et al T-DNA
S6 Table: Analysis of methylated cytosines on the pCSA110 plasmid for SAIL_232.
plasmid	position	strand	C-type	mC count	read count	mC call
pCSA110	0	minus	CHH	0	2	0
pCSA110	1	minus	CHH	0	2	0
pCSA110	4	plus	CHH	0	2	0
pCSA110	5	plus	CHG	0	3	0
pCSA110	7	minus	CHG	0	5	0
pCSA110	10	plus	CHH	0	5	0
pCSA110	12	plus	CHG	1	6	0
pCSA110	14	minus	CHG	0	7	0
pCSA110	15	minus	CHH	0	7	0
pCSA110	16	plus	CHG	1	10	0
pCSA110	18	minus	CHG	0	11	0
pCSA110	19	plus	CHH	1	12	0
pCSA110	22	plus	CG	1	13	0
pCSA110	23	minus	CG	0	14	0
pCSA110	24	plus	CHH	1	13	0
pCSA110	26	plus	CHG	1	14	0
pCSA110	28	minus	CHG	0	16	0
pCSA110	30	plus	CHH	1	16	0
pCSA110	33	plus	CG	1	17	0
pCSA110	34	minus	CG	0	20	0
pCSA110	38	plus	CHH	1	20	0
pCSA110	42	plus	CHH	1	22	0
pCSA110	45	plus	CHH	1	23	0
pCSA110	48	minus	CHH	0	24	0
pCSA110	49	plus	CHH	1	25	0
pCSA110	52	plus	CHH	0	28	0
pCSA110	53	plus	CHH	1	29	0
pCSA110	54	plus	CHH	1	30	0
pCSA110	56	plus	CHG	1	32	0
pCSA110	57	plus	CG	2	33	0
pCSA110	58	minus	CG	1	33	0
pCSA110	59	plus	CG	1	34	0
pCSA110	60	minus	CG	0	38	0
pCSA110	62	minus	CHH	0	39	0
pCSA110	65	plus	CHH	1	37	0
pCSA110	68	plus	CHG	1	40	0
pCSA110	69	plus	CG	2	40	0
pCSA110	70	minus	CG	0	45	0
pCSA110	72	minus	CHH	1	45	0
pCSA110	76	plus	CHH	0	43	0
pCSA110	80	plus	CHH	1	46	0
pCSA110	81	plus	CHG	1	47	0
pCSA110	82	plus	CG	1	48	0
pCSA110	83	minus	CG	0	50	0
pCSA110	84	minus	CHG	0	50	0
pCSA110	85	plus	CHG	1	49	0
pCSA110	87	minus	CHG	0	52	0
pCSA110	88	plus	CHH	0	51	0
pCSA110	92	minus	CHH	1	56	0
pCSA110	95	minus	CHH	0	58	0
pCSA110	96	plus	CHG	2	56	0
pCSA110	97	plus	CG	1	57	0
pCSA110	98	minus	CG	0	58	0
pCSA110	101	plus	CHH	1	60	0
pCSA110	104	plus	CHG	1	61	0
pCSA110	105	plus	CG	1	61	0
pCSA110	106	minus	CG	0	61	0
pCSA110	111	minus	CHH	0	64	0
pCSA110	112	plus	CHH	2	64	0
pCSA110	115	plus	CG	3	67	0
pCSA110	116	minus	CG	0	65	0
pCSA110	117	minus	CHG	0	65	0
pCSA110	121	plus	CHH	1	71	0
pCSA110	124	minus	CHH	0	67	0
pCSA110	126	minus	CHH	0	68	0
pCSA110	127	plus	CHH	1	75	0
pCSA110	131	minus	CHH	0	69	0
pCSA110	133	plus	CHG	1	79	0
pCSA110	135	minus	CHG	0	73	0
pCSA110	136	plus	CHG	1	81	0
pCSA110	137	plus	CG	2	82	0
pCSA110	138	minus	CG	0	73	0
pCSA110	139	plus	CHH	1	83	0
pCSA110	140	plus	CHH	0	83	0
pCSA110	144	plus	CHH	0	85	0
pCSA110	147	plus	CG	1	87	0
pCSA110	148	minus	CG	1	75	0
pCSA110	149	minus	CHG	0	75	0
pCSA110	150	plus	CHH	0	88	0
pCSA110	152	plus	CHH	2	89	0
pCSA110	154	plus	CHH	0	88	0
pCSA110	155	plus	CHG	1	89	0
pCSA110	156	plus	CG	1	88	0
pCSA110	157	minus	CG	0	71	0
pCSA110	158	plus	CHG	1	89	0
pCSA110	160	minus	CHG	1	72	0
pCSA110	162	plus	CG	2	91	0
pCSA110	163	minus	CG	0	72	0
pCSA110	164	plus	CHG	1	91	0
pCSA110	165	plus	CG	0	91	0
pCSA110	166	minus	CG	0	72	0
pCSA110	168	plus	CHH	0	89	0
pCSA110	169	plus	CHG	0	88	0
pCSA110	170	plus	CG	0	88	0
pCSA110	171	minus	CG	0	70	0
pCSA110	172	minus	CHG	0	70	0
pCSA110	174	plus	CHG	1	88	0
pCSA110	176	minus	CHG	0	69	0
pCSA110	179	minus	CHH	1	69	0
pCSA110	180	minus	CHH	0	68	0
pCSA110	181	minus	CHH	1	68	0
pCSA110	182	plus	CHG	0	88	0
pCSA110	184	minus	CHG	0	67	0
pCSA110	185	plus	CHH	0	88	0
pCSA110	186	plus	CHG	0	87	0
pCSA110	188	minus	CHG	1	66	0
pCSA110	192	plus	CG	0	87	0
pCSA110	193	minus	CG	0	67	0
pCSA110	195	minus	CHH	0	67	0
pCSA110	197	minus	CHH	0	68	0
pCSA110	198	minus	CHH	0	68	0
pCSA110	200	minus	CHH	1	68	0
pCSA110	206	minus	CHH	0	66	0
pCSA110	208	minus	CHH	0	65	0
pCSA110	209	plus	CHG	0	83	0
pCSA110	210	plus	CG	2	83	0
pCSA110	211	minus	CG	0	62	0
pCSA110	213	minus	CHH	1	62	0
pCSA110	214	plus	CHG	0	82	0
pCSA110	216	minus	CHG	0	61	0
pCSA110	217	plus	CHG	0	83	0
pCSA110	218	plus	CG	3	83	0
pCSA110	219	minus	CG	0	62	0
pCSA110	220	minus	CHG	0	62	0
pCSA110	222	plus	CG	1	84	0
pCSA110	223	minus	CG	0	62	0
pCSA110	224	minus	CHG	0	63	0
pCSA110	225	minus	CHH	0	63	0
pCSA110	226	minus	CHH	0	63	0
pCSA110	228	minus	CHH	0	63	0
pCSA110	229	plus	CHG	1	86	0
pCSA110	231	minus	CHG	1	63	0
pCSA110	234	minus	CHH	1	62	0
pCSA110	235	minus	CHH	0	64	0
pCSA110	236	plus	CHG	0	87	0
pCSA110	238	minus	CHG	0	64	0
pCSA110	239	minus	CHH	0	63	0
pCSA110	240	plus	CHG	0	88	0
pCSA110	242	minus	CHG	1	62	0
pCSA110	243	minus	CHH	0	63	0
pCSA110	245	minus	CHH	0	62	0
pCSA110	246	minus	CHH	0	64	0
pCSA110	247	plus	CHG	0	87	0
pCSA110	249	minus	CHG	0	66	0
pCSA110	250	minus	CHH	0	65	0
pCSA110	258	minus	CHH	0	67	0
pCSA110	260	minus	CHH	1	66	0
pCSA110	261	minus	CHH	0	67	0
pCSA110	263	minus	CHH	0	68	0
pCSA110	268	plus	CHH	2	93	0
pCSA110	274	minus	CHH	0	77	0
pCSA110	276	plus	CG	3	94	0
pCSA110	277	minus	CG	1	78	0
pCSA110	278	plus	CHH	1	94	0
pCSA110	282	minus	CHH	1	78	0
pCSA110	284	plus	CHH	1	95	0
pCSA110	287	plus	CHH	0	98	0
pCSA110	295	plus	CHH	3	99	0
pCSA110	297	plus	CHH	2	99	0
pCSA110	301	minus	CHH	1	84	0
pCSA110	302	plus	CG	1	102	0
pCSA110	303	minus	CG	0	86	0
pCSA110	304	minus	CHG	0	86	0
pCSA110	306	plus	CG	0	103	0
pCSA110	307	minus	CG	0	87	0
pCSA110	316	minus	CHH	1	92	0
pCSA110	319	plus	CHG	2	107	0
pCSA110	321	minus	CHG	0	95	0
pCSA110	328	plus	CG	0	107	0
pCSA110	329	minus	CG	0	92	0
pCSA110	330	plus	CHG	1	108	0
pCSA110	331	plus	CG	1	109	0
pCSA110	332	minus	CG	0	91	0
pCSA110	337	minus	CHH	1	89	0
pCSA110	342	plus	CG	1	116	0
pCSA110	343	minus	CG	1	90	0
pCSA110	348	minus	CHH	1	89	0
pCSA110	349	minus	CHH	0	90	0
pCSA110	351	minus	CHH	0	91	0
pCSA110	355	plus	CG	1	120	0
pCSA110	356	minus	CG	0	91	0
pCSA110	358	minus	CHH	0	90	0
pCSA110	362	minus	CHH	1	90	0
pCSA110	363	minus	CHH	0	89	0
pCSA110	368	minus	CHH	0	88	0
pCSA110	374	plus	CHG	1	123	0
pCSA110	376	minus	CHG	0	89	0
pCSA110	379	minus	CHH	0	89	0
pCSA110	380	plus	CHH	1	123	0
pCSA110	383	minus	CHH	0	89	0
pCSA110	385	minus	CHH	1	88	0
pCSA110	390	minus	CHH	1	89	0
pCSA110	395	minus	CHH	1	88	0
pCSA110	396	minus	CHH	2	87	0
pCSA110	403	minus	CHH	1	84	0
pCSA110	404	minus	CHH	0	84	0
pCSA110	405	minus	CHH	0	83	0
pCSA110	408	minus	CHH	0	80	0
pCSA110	417	minus	CHH	0	80	0
pCSA110	418	minus	CHH	0	79	0
pCSA110	421	minus	CHH	1	77	0
pCSA110	422	plus	CHH	0	122	0
pCSA110	425	minus	CHH	0	76	0
pCSA110	426	minus	CHH	1	76	0
pCSA110	427	plus	CHH	0	120	0
pCSA110	435	plus	CHH	0	117	0
pCSA110	436	plus	CHH	2	117	0
pCSA110	441	plus	CHG	1	116	0
pCSA110	443	minus	CHG	1	77	0
pCSA110	448	minus	CHH	0	76	0
pCSA110	449	minus	CHH	0	76	0
pCSA110	450	plus	CG	1	114	0
pCSA110	451	minus	CG	0	75	0
pCSA110	456	minus	CHH	0	74	0
pCSA110	457	minus	CHH	1	73	0
pCSA110	458	plus	CG	0	106	0
pCSA110	459	minus	CG	0	73	0
pCSA110	461	plus	CHH	1	104	0
pCSA110	463	plus	CHG	0	103	0
pCSA110	464	plus	CG	0	103	0
pCSA110	465	minus	CG	1	76	0
pCSA110	466	plus	CG	0	101	0
pCSA110	467	minus	CG	0	76	0
pCSA110	469	plus	CG	0	100	0
pCSA110	470	minus	CG	0	77	0
pCSA110	471	minus	CHG	1	78	0
pCSA110	473	plus	CHH	0	102	0
pCSA110	475	plus	CG	0	101	0
pCSA110	476	minus	CG	0	85	0
pCSA110	477	plus	CG	1	100	0
pCSA110	478	minus	CG	0	88	0
pCSA110	479	plus	CHH	0	101	0
pCSA110	483	plus	CHG	1	99	0
pCSA110	484	plus	CG	2	99	0
pCSA110	485	minus	CG	0	97	0
pCSA110	488	plus	CHH	0	99	0
pCSA110	491	minus	CHH	2	99	0
pCSA110	492	plus	CHG	0	99	0
pCSA110	494	minus	CHG	0	99	0
pCSA110	499	minus	CHH	0	102	0
pCSA110	500	plus	CG	0	97	0
pCSA110	501	minus	CG	0	103	0
pCSA110	504	minus	CHH	1	103	0
pCSA110	508	minus	CHH	0	109	0
pCSA110	509	minus	CHH	1	108	0
pCSA110	512	plus	CHH	0	98	0
pCSA110	514	plus	CHH	1	97	0
pCSA110	519	minus	CHH	0	117	0
pCSA110	521	plus	CHH	0	97	0
pCSA110	524	minus	CHH	1	121	0
pCSA110	525	plus	CG	0	97	0
pCSA110	526	minus	CG	3	124	0
pCSA110	528	minus	CHH	1	125	0
pCSA110	529	minus	CHH	1	124	0
pCSA110	530	plus	CHH	0	97	0
pCSA110	533	minus	CHH	1	125	0
pCSA110	534	minus	CHH	2	124	0
pCSA110	535	plus	CG	0	97	0
pCSA110	536	minus	CG	0	124	0
pCSA110	538	minus	CHH	1	125	0
pCSA110	540	plus	CHG	0	95	0
pCSA110	542	minus	CHG	0	128	0
pCSA110	543	plus	CG	0	95	0
pCSA110	544	minus	CG	1	130	0
pCSA110	548	plus	CHH	0	96	0
pCSA110	553	plus	CHH	1	97	0
pCSA110	558	minus	CHH	0	145	0
pCSA110	560	plus	CG	0	98	0
pCSA110	561	minus	CG	0	146	0
pCSA110	567	minus	CHH	3	147	0
pCSA110	568	minus	CHH	1	146	0
pCSA110	569	plus	CHG	0	97	0
pCSA110	571	minus	CHG	0	146	0
pCSA110	572	plus	CG	1	97	0
pCSA110	573	minus	CG	1	146	0
pCSA110	574	minus	CHG	0	146	0
pCSA110	577	plus	CHH	1	97	0
pCSA110	580	minus	CHH	0	149	0
pCSA110	586	minus	CHH	1	153	0
pCSA110	589	minus	CHH	2	156	0
pCSA110	590	minus	CHH	0	156	0
pCSA110	595	minus	CHH	0	162	0
pCSA110	599	plus	CHG	0	91	0
pCSA110	601	minus	CHG	0	166	0
pCSA110	606	plus	CHH	0	97	0
pCSA110	607	plus	CHG	0	98	0
pCSA110	608	plus	CG	1	99	0
pCSA110	609	minus	CG	0	168	0
pCSA110	610	plus	CG	0	100	0
pCSA110	611	minus	CG	1	169	0
pCSA110	617	plus	CHG	0	104	0
pCSA110	619	minus	CHG	0	172	0
pCSA110	620	minus	CHH	0	171	0
pCSA110	621	plus	CHH	2	104	0
pCSA110	622	plus	CHG	0	103	0
pCSA110	623	plus	CG	1	104	0
pCSA110	624	minus	CG	1	169	0
pCSA110	625	minus	CHG	0	169	0
pCSA110	628	minus	CHH	0	171	0
pCSA110	629	plus	CHH	1	104	0
pCSA110	630	plus	CHH	1	104	0
pCSA110	633	minus	CHH	0	171	0
pCSA110	635	plus	CHH	1	103	0
pCSA110	636	plus	CHH	0	103	0
pCSA110	639	plus	CHH	0	102	0
pCSA110	641	plus	CG	1	101	0
pCSA110	642	minus	CG	1	167	0
pCSA110	643	plus	CHG	0	100	0
pCSA110	644	plus	CG	0	100	0
pCSA110	645	minus	CG	1	164	0
pCSA110	653	plus	CG	2	102	0
pCSA110	654	minus	CG	1	159	0
pCSA110	656	plus	CHH	0	102	0
pCSA110	657	plus	CHH	0	102	0
pCSA110	664	minus	CHH	0	158	0
pCSA110	667	minus	CHH	1	158	0
pCSA110	679	plus	CHG	1	97	0
pCSA110	681	minus	CHG	1	149	0
pCSA110	683	plus	CHH	0	95	0
pCSA110	685	plus	CG	3	95	0
pCSA110	686	minus	CG	0	148	0
pCSA110	687	minus	CHG	0	148	0
pCSA110	691	plus	CHH	0	94	0
pCSA110	695	plus	CG	0	95	0
pCSA110	696	minus	CG	0	143	0
pCSA110	698	plus	CHH	1	93	0
pCSA110	700	plus	CG	0	93	0
pCSA110	701	minus	CG	0	134	0
pCSA110	703	plus	CHH	0	92	0
pCSA110	706	minus	CHH	1	133	0
pCSA110	707	plus	CG	0	91	0
pCSA110	708	minus	CG	0	133	0
pCSA110	709	plus	CHH	2	93	0
pCSA110	711	plus	CHG	0	94	0
pCSA110	713	minus	CHG	1	132	0
pCSA110	718	minus	CHH	1	128	0
pCSA110	725	plus	CHH	0	95	0
pCSA110	727	plus	CHH	0	96	0
pCSA110	736	plus	CHH	0	96	0
pCSA110	740	minus	CHH	0	116	0
pCSA110	742	plus	CG	3	95	0
pCSA110	743	minus	CG	1	112	0
pCSA110	744	minus	CHG	1	112	0
pCSA110	745	plus	CHH	1	97	0
pCSA110	746	plus	CHH	1	97	0
pCSA110	748	plus	CHH	0	97	0
pCSA110	751	minus	CHH	0	111	0
pCSA110	758	plus	CHH	0	96	0
pCSA110	759	plus	CHH	0	96	0
pCSA110	764	plus	CHH	0	96	0
pCSA110	766	plus	CHG	1	95	0
pCSA110	767	plus	CG	0	96	0
pCSA110	768	minus	CG	1	119	0
pCSA110	774	plus	CHH	0	100	0
pCSA110	781	plus	CHH	0	99	0
pCSA110	786	plus	CHH	0	100	0
pCSA110	789	minus	CHH	0	121	0
pCSA110	793	plus	CHH	0	99	0
pCSA110	795	plus	CHH	0	99	0
pCSA110	805	plus	CHH	0	99	0
pCSA110	810	plus	CHH	1	100	0
pCSA110	813	plus	CHH	0	102	0
pCSA110	814	plus	CHH	1	103	0
pCSA110	816	plus	CHH	0	104	0
pCSA110	818	plus	CG	0	105	0
pCSA110	819	minus	CG	0	135	0
pCSA110	821	minus	CHH	0	137	0
pCSA110	822	minus	CHH	0	139	0
pCSA110	825	plus	CHH	0	107	0
pCSA110	826	plus	CHH	0	106	0
pCSA110	829	minus	CHH	0	139	0
pCSA110	831	minus	CHH	2	140	0
pCSA110	832	plus	CHH	0	105	0
pCSA110	833	plus	CHH	0	105	0
pCSA110	834	plus	CHG	0	105	0
pCSA110	836	minus	CHG	0	142	0
pCSA110	839	plus	CG	0	105	0
pCSA110	840	minus	CG	0	142	0
pCSA110	842	plus	CG	0	104	0
pCSA110	843	minus	CG	0	140	0
pCSA110	844	plus	CHH	1	104	0
pCSA110	845	plus	CHG	0	105	0
pCSA110	846	plus	CG	1	105	0
pCSA110	847	minus	CG	0	142	0
pCSA110	848	minus	CHG	1	141	0
pCSA110	849	plus	CHG	0	105	0
pCSA110	850	plus	CG	0	105	0
pCSA110	851	minus	CG	1	143	0
pCSA110	853	plus	CHH	1	106	0
pCSA110	856	plus	CHG	0	108	0
pCSA110	857	plus	CG	2	107	0
pCSA110	858	minus	CG	0	138	0
pCSA110	859	plus	CHG	0	108	0
pCSA110	860	plus	CG	1	107	0
pCSA110	861	minus	CG	1	137	0
pCSA110	863	minus	CHH	0	140	0
pCSA110	864	plus	CHH	0	105	0
pCSA110	865	plus	CHH	1	104	0
pCSA110	867	plus	CHG	0	106	0
pCSA110	868	plus	CG	0	106	0
pCSA110	869	minus	CG	0	143	0
pCSA110	871	minus	CHH	1	145	0
pCSA110	872	minus	CHH	0	145	0
pCSA110	873	plus	CG	0	106	0
pCSA110	874	minus	CG	1	143	0
pCSA110	875	minus	CHG	1	143	0
pCSA110	877	plus	CHH	0	106	0
pCSA110	880	minus	CHH	1	142	0
pCSA110	881	plus	CHG	0	105	0
pCSA110	882	plus	CG	0	105	0
pCSA110	883	minus	CG	0	140	0
pCSA110	884	minus	CHG	0	140	0
pCSA110	885	plus	CG	0	106	0
pCSA110	886	minus	CG	0	141	0
pCSA110	887	minus	CHG	0	140	0
pCSA110	889	plus	CHG	1	107	0
pCSA110	891	minus	CHG	0	139	0
pCSA110	892	plus	CHH	0	108	0
pCSA110	894	plus	CHH	1	107	0
pCSA110	895	plus	CHH	2	107	0
pCSA110	898	plus	CG	0	108	0
pCSA110	899	minus	CG	1	139	0
pCSA110	901	plus	CHH	0	105	0
pCSA110	904	plus	CHH	0	105	0
pCSA110	905	plus	CHH	0	105	0
pCSA110	907	plus	CHH	0	107	0
pCSA110	910	plus	CHH	0	106	0
pCSA110	913	plus	CG	0	106	0
pCSA110	914	minus	CG	1	137	0
pCSA110	916	minus	CHH	0	138	0
pCSA110	918	plus	CHH	0	102	0
pCSA110	921	minus	CHH	0	136	0
pCSA110	922	plus	CHH	0	103	0
pCSA110	924	plus	CG	0	102	0
pCSA110	925	minus	CG	2	137	0
pCSA110	926	minus	CHG	2	137	0
pCSA110	928	plus	CHH	0	102	0
pCSA110	931	plus	CHH	1	104	0
pCSA110	934	plus	CHG	0	104	0
pCSA110	935	plus	CG	1	104	0
pCSA110	936	minus	CG	0	135	0
pCSA110	939	plus	CHG	0	104	0
pCSA110	940	plus	CG	0	105	0
pCSA110	941	minus	CG	0	132	0
pCSA110	943	minus	CHH	0	131	0
pCSA110	944	plus	CHG	0	105	0
pCSA110	945	plus	CG	2	106	0
pCSA110	946	minus	CG	0	133	0
pCSA110	947	plus	CHG	0	105	0
pCSA110	949	minus	CHG	0	134	0
pCSA110	950	minus	CHH	0	134	0
pCSA110	953	plus	CHG	1	105	0
pCSA110	954	plus	CG	0	104	0
pCSA110	955	minus	CG	0	132	0
pCSA110	956	plus	CHG	0	103	0
pCSA110	958	minus	CHG	0	132	0
pCSA110	959	minus	CHH	0	132	0
pCSA110	961	minus	CHH	0	131	0
pCSA110	963	minus	CHH	5	132	0
pCSA110	964	minus	CHH	0	132	0
pCSA110	966	plus	CG	0	97	0
pCSA110	967	minus	CG	1	129	0
pCSA110	968	minus	CHG	0	129	0
pCSA110	970	plus	CG	1	97	0
pCSA110	971	minus	CG	0	128	0
pCSA110	973	plus	CHH	0	98	0
pCSA110	974	plus	CHH	1	99	0
pCSA110	976	plus	CG	0	98	0
pCSA110	977	minus	CG	0	125	0
pCSA110	979	plus	CHG	0	100	0
pCSA110	980	plus	CG	0	100	0
pCSA110	981	minus	CG	1	124	0
pCSA110	983	plus	CHG	0	101	0
pCSA110	985	minus	CHG	0	124	0
pCSA110	986	plus	CG	0	99	0
pCSA110	987	minus	CG	3	125	0
pCSA110	988	minus	CHG	0	124	0
pCSA110	989	minus	CHH	0	123	0
pCSA110	991	minus	CHH	0	122	0
pCSA110	992	plus	CG	0	97	0
pCSA110	993	minus	CG	1	121	0
pCSA110	994	plus	CHH	1	96	0
pCSA110	998	plus	CHH	0	97	0
pCSA110	999	plus	CHH	0	98	0
pCSA110	1000	plus	CHG	1	98	0
pCSA110	1002	minus	CHG	1	116	0
pCSA110	1003	minus	CHH	1	116	0
pCSA110	1004	plus	CHH	0	97	0
pCSA110	1006	plus	CG	0	94	0
pCSA110	1007	minus	CG	1	119	0
pCSA110	1009	plus	CG	1	92	0
pCSA110	1010	minus	CG	2	119	0
pCSA110	1011	plus	CHG	0	92	0
pCSA110	1012	plus	CG	1	93	0
pCSA110	1013	minus	CG	0	119	0
pCSA110	1015	minus	CHH	1	118	0
pCSA110	1016	minus	CHH	0	117	0
pCSA110	1018	minus	CHH	0	117	0
pCSA110	1019	minus	CHH	0	117	0
pCSA110	1021	plus	CG	0	92	0
pCSA110	1022	minus	CG	0	116	0
pCSA110	1023	minus	CHG	0	115	0
pCSA110	1024	plus	CG	0	92	0
pCSA110	1025	minus	CG	1	116	0
pCSA110	1027	minus	CHH	0	116	0
pCSA110	1028	minus	CHH	0	116	0
pCSA110	1030	plus	CG	0	91	0
pCSA110	1031	minus	CG	0	114	0
pCSA110	1032	plus	CHG	0	92	0
pCSA110	1033	plus	CG	0	93	0
pCSA110	1034	minus	CG	0	118	0
pCSA110	1035	minus	CHG	0	118	0
pCSA110	1036	plus	CHH	0	91	0
pCSA110	1039	plus	CG	0	91	0
pCSA110	1040	minus	CG	0	118	0
pCSA110	1041	plus	CHH	0	92	0
pCSA110	1042	plus	CHH	0	93	0
pCSA110	1045	plus	CG	1	92	0
pCSA110	1046	minus	CG	1	117	0
pCSA110	1047	plus	CG	0	91	0
pCSA110	1048	minus	CG	0	117	0
pCSA110	1049	minus	CHG	0	117	0
pCSA110	1050	minus	CHH	0	115	0
pCSA110	1051	plus	CHH	0	90	0
pCSA110	1052	plus	CHH	0	90	0
pCSA110	1053	plus	CHH	0	90	0
pCSA110	1054	plus	CHG	0	91	0
pCSA110	1056	minus	CHG	1	115	0
pCSA110	1057	minus	CHH	0	115	0
pCSA110	1060	minus	CHH	0	115	0
pCSA110	1061	minus	CHH	0	115	0
pCSA110	1062	plus	CHH	1	90	0
pCSA110	1064	plus	CG	1	90	0
pCSA110	1065	minus	CG	1	114	0
pCSA110	1066	plus	CHH	1	92	0
pCSA110	1069	plus	CG	0	92	0
pCSA110	1070	minus	CG	0	115	0
pCSA110	1071	plus	CHH	0	90	0
pCSA110	1072	plus	CHH	0	90	0
pCSA110	1075	plus	CG	1	90	0
pCSA110	1076	minus	CG	1	117	0
pCSA110	1078	plus	CHG	0	88	0
pCSA110	1080	minus	CHG	1	115	0
pCSA110	1081	minus	CHH	0	114	0
pCSA110	1083	plus	CG	0	87	0
pCSA110	1084	minus	CG	0	114	0
pCSA110	1085	minus	CHG	0	115	0
pCSA110	1086	plus	CHG	0	86	0
pCSA110	1087	plus	CG	0	86	0
pCSA110	1088	minus	CG	0	113	0
pCSA110	1090	minus	CHH	0	115	0
pCSA110	1092	plus	CG	0	84	0
pCSA110	1093	minus	CG	0	112	0
pCSA110	1095	plus	CHG	1	80	0
pCSA110	1096	plus	CG	0	80	0
pCSA110	1097	minus	CG	1	109	0
pCSA110	1099	minus	CHH	0	108	0
pCSA110	1102	plus	CG	1	76	0
pCSA110	1103	minus	CG	0	107	0
pCSA110	1105	plus	CHH	0	77	0
pCSA110	1107	plus	CHH	0	76	0
pCSA110	1108	plus	CHH	0	76	0
pCSA110	1109	plus	CHH	1	76	0
pCSA110	1110	plus	CHH	0	77	0
pCSA110	1111	plus	CHG	0	76	0
pCSA110	1112	plus	CG	0	76	0
pCSA110	1113	minus	CG	0	108	0
pCSA110	1114	plus	CHH	0	77	0
pCSA110	1115	plus	CHH	0	78	0
pCSA110	1117	plus	CHH	1	79	0
pCSA110	1118	plus	CHG	1	79	0
pCSA110	1120	minus	CHG	0	107	0
pCSA110	1121	plus	CG	0	78	0
pCSA110	1122	minus	CG	0	107	0
pCSA110	1123	minus	CHG	0	106	0
pCSA110	1125	plus	CG	0	77	0
pCSA110	1126	minus	CG	0	107	0
pCSA110	1127	minus	CHG	0	107	0
pCSA110	1128	minus	CHH	0	107	0
pCSA110	1130	plus	CHG	0	75	0
pCSA110	1132	minus	CHG	1	107	0
pCSA110	1133	minus	CHH	0	106	0
pCSA110	1134	minus	CHH	0	106	0
pCSA110	1135	plus	CHH	0	77	0
pCSA110	1137	plus	CHH	0	78	0
pCSA110	1138	plus	CHH	1	79	0
pCSA110	1140	plus	CG	0	81	0
pCSA110	1141	minus	CG	0	107	0
pCSA110	1142	plus	CHH	0	82	0
pCSA110	1144	plus	CHH	0	83	0
pCSA110	1147	plus	CHH	0	83	0
pCSA110	1149	plus	CHH	0	83	0
pCSA110	1150	plus	CHH	1	83	0
pCSA110	1151	plus	CHH	2	83	0
pCSA110	1153	plus	CHH	0	83	0
pCSA110	1154	plus	CHG	0	83	0
pCSA110	1156	minus	CHG	1	109	0
pCSA110	1157	plus	CHG	0	84	0
pCSA110	1159	minus	CHG	1	107	0
pCSA110	1162	minus	CHH	0	106	0
pCSA110	1164	plus	CHH	0	87	0
pCSA110	1165	plus	CHH	1	86	0
pCSA110	1166	plus	CHG	0	86	0
pCSA110	1168	minus	CHG	1	105	0
pCSA110	1169	minus	CHH	0	104	0
pCSA110	1171	minus	CHH	0	104	0
pCSA110	1172	minus	CHH	1	104	0
pCSA110	1173	plus	CHH	0	84	0
pCSA110	1175	plus	CHG	2	85	0
pCSA110	1177	minus	CHG	0	104	0
pCSA110	1178	minus	CHH	0	104	0
pCSA110	1179	minus	CHH	0	103	0
pCSA110	1180	plus	CHH	1	84	0
pCSA110	1183	plus	CHH	0	84	0
pCSA110	1186	minus	CHH	1	104	0
pCSA110	1188	minus	CHH	1	103	0
pCSA110	1189	plus	CG	1	86	0
pCSA110	1190	minus	CG	1	101	0
pCSA110	1192	minus	CHH	0	100	0
pCSA110	1193	minus	CHH	0	100	0
pCSA110	1195	plus	CG	2	86	0
pCSA110	1196	minus	CG	0	101	0
pCSA110	1197	plus	CHG	0	86	0
pCSA110	1199	minus	CHG	0	104	0
pCSA110	1201	plus	CHH	0	86	0
pCSA110	1204	plus	CG	1	86	0
pCSA110	1205	minus	CG	0	106	0
pCSA110	1206	minus	CHG	1	105	0
pCSA110	1207	minus	CHH	1	105	0
pCSA110	1208	plus	CHG	0	87	0
pCSA110	1210	minus	CHG	1	107	0
pCSA110	1211	plus	CHH	0	87	0
pCSA110	1212	plus	CHH	1	88	0
pCSA110	1213	plus	CHH	1	88	0
pCSA110	1216	plus	CG	0	89	0
pCSA110	1217	minus	CG	2	108	0
pCSA110	1219	plus	CHH	0	89	0
pCSA110	1220	plus	CHG	0	88	0
pCSA110	1221	plus	CG	1	89	0
pCSA110	1222	minus	CG	1	106	0
pCSA110	1224	minus	CHH	0	106	0
pCSA110	1225	plus	CG	0	89	0
pCSA110	1226	minus	CG	0	107	0
pCSA110	1228	minus	CHH	1	107	0
pCSA110	1229	plus	CG	3	92	0
pCSA110	1230	minus	CG	0	105	0
pCSA110	1231	plus	CHH	0	91	0
pCSA110	1234	minus	CHH	2	103	0
pCSA110	1235	plus	CHH	0	93	0
pCSA110	1237	plus	CG	0	93	0
pCSA110	1238	minus	CG	0	97	0
pCSA110	1240	minus	CHH	0	95	0
pCSA110	1241	minus	CHH	0	94	0
pCSA110	1242	plus	CG	1	91	0
pCSA110	1243	minus	CG	0	93	0
pCSA110	1244	plus	CHH	0	90	0
pCSA110	1246	plus	CG	1	90	0
pCSA110	1247	minus	CG	0	93	0
pCSA110	1248	minus	CHG	0	92	0
pCSA110	1253	minus	CHH	0	90	0
pCSA110	1254	plus	CHH	0	85	0
pCSA110	1255	plus	CHH	0	85	0
pCSA110	1256	plus	CHH	0	85	0
pCSA110	1257	plus	CHH	0	85	0
pCSA110	1258	plus	CHG	0	85	0
pCSA110	1259	plus	CG	3	85	0
pCSA110	1260	minus	CG	1	85	0
pCSA110	1261	plus	CG	0	83	0
pCSA110	1262	minus	CG	0	82	0
pCSA110	1263	minus	CHG	1	81	0
pCSA110	1264	plus	CHH	1	82	0
pCSA110	1267	minus	CHH	0	80	0
pCSA110	1268	plus	CHG	0	78	0
pCSA110	1270	minus	CHG	0	77	0
pCSA110	1271	plus	CG	0	77	0
pCSA110	1272	minus	CG	1	76	0
pCSA110	1273	minus	CHG	0	75	0
pCSA110	1274	minus	CHH	0	75	0
pCSA110	1275	plus	CG	0	74	0
pCSA110	1276	minus	CG	1	72	0
pCSA110	1277	minus	CHG	0	71	0
pCSA110	1278	plus	CHG	0	74	0
pCSA110	1279	plus	CG	1	72	0
pCSA110	1280	minus	CG	1	70	0
pCSA110	1281	minus	CHG	0	69	0
pCSA110	1282	plus	CHH	0	70	0
pCSA110	1285	plus	CHH	0	68	0
pCSA110	1288	minus	CHH	0	64	0
pCSA110	1289	plus	CHH	0	65	0
pCSA110	1291	plus	CG	0	62	0
pCSA110	1292	minus	CG	1	62	0
pCSA110	1293	minus	CHG	0	62	0
pCSA110	1294	minus	CHH	0	62	0
pCSA110	1297	plus	CHG	0	60	0
pCSA110	1299	minus	CHG	0	58	0
pCSA110	1300	minus	CHH	1	57	0
pCSA110	1301	plus	CHH	0	58	0
pCSA110	1304	minus	CHH	1	54	0
pCSA110	1306	plus	CG	0	56	0
pCSA110	1307	minus	CG	0	53	0
pCSA110	1309	minus	CHH	1	52	0
pCSA110	1310	minus	CHH	1	52	0
pCSA110	1311	minus	CHH	0	51	0
pCSA110	1315	plus	CHG	0	51	0
pCSA110	1317	minus	CHG	0	48	0
pCSA110	1318	minus	CHH	0	47	0
pCSA110	1319	plus	CHG	0	48	0
pCSA110	1321	minus	CHG	0	46	0
pCSA110	1322	plus	CHG	0	46	0
pCSA110	1324	minus	CHG	1	44	0
pCSA110	1325	minus	CHH	0	44	0
pCSA110	1327	plus	CHH	0	45	0
pCSA110	1330	plus	CHG	0	43	0
pCSA110	1332	minus	CHG	0	40	0
pCSA110	1333	plus	CHH	0	41	0
pCSA110	1334	plus	CHG	0	40	0
pCSA110	1336	minus	CHG	0	36	0
pCSA110	1337	plus	CHG	0	36	0
pCSA110	1338	plus	CG	2	35	0
pCSA110	1339	minus	CG	0	35	0
pCSA110	1340	minus	CHG	0	34	0
pCSA110	1343	plus	CHG	0	31	0
pCSA110	1344	plus	CG	1	31	0
pCSA110	1345	minus	CG	0	30	0
pCSA110	1346	plus	CHH	0	29	0
pCSA110	1347	plus	CHH	0	29	0
pCSA110	1348	plus	CHG	0	29	0
pCSA110	1349	plus	CG	0	28	0
pCSA110	1350	minus	CG	0	23	0
pCSA110	1352	plus	CHG	0	28	0
pCSA110	1353	plus	CG	1	28	0
pCSA110	1354	minus	CG	0	19	0
pCSA110	1355	minus	CHG	0	18	0
pCSA110	1357	plus	CHH	0	25	0
pCSA110	1358	plus	CHG	0	24	0
pCSA110	1360	minus	CHG	0	14	0
pCSA110	1361	plus	CHH	0	21	0
pCSA110	1362	plus	CHG	0	20	0
pCSA110	1363	plus	CG	0	19	0
pCSA110	1364	minus	CG	0	11	0
pCSA110	1366	plus	CHH	0	16	0
pCSA110	1368	plus	CHG	0	15	0
pCSA110	1369	plus	CG	0	14	0
pCSA110	1370	minus	CG	0	7	0
pCSA110	1372	minus	CHH	0	5	0
pCSA110	1375	plus	CHG	0	11	0
pCSA110	1377	minus	CHG	0	1	0
pCSA110	1380	plus	CHH	0	5	0
pCSA110	1382	plus	CHH	0	5	0
pCSA110	1384	plus	CG	0	3	0
pCSA110	1386	plus	CG	0	1	0
pCSA110	1421	plus	CHG	0	1	0
pCSA110	1422	plus	CG	0	1	0
pCSA110	1423	minus	CG	0	3	0
pCSA110	1424	plus	CHG	0	3	0
pCSA110	1426	minus	CHG	0	8	0
pCSA110	1431	plus	CHH	0	9	0
pCSA110	1433	plus	CHH	0	10	0
pCSA110	1434	plus	CHG	0	11	0
pCSA110	1436	minus	CHG	1	17	0
pCSA110	1438	plus	CHH	0	14	0
pCSA110	1440	plus	CHH	0	16	0
pCSA110	1442	plus	CHH	0	18	0
pCSA110	1444	plus	CHH	0	20	0
pCSA110	1447	plus	CHH	0	23	0
pCSA110	1452	plus	CHH	0	27	0
pCSA110	1456	plus	CHH	0	29	0
pCSA110	1458	plus	CHH	0	31	0
pCSA110	1460	plus	CHH	0	32	0
pCSA110	1462	plus	CHH	0	33	0
pCSA110	1472	minus	CHH	0	57	0
pCSA110	1474	minus	CHH	0	57	0
pCSA110	1476	minus	CHH	0	57	0
pCSA110	1478	minus	CHH	0	57	0
pCSA110	1481	minus	CHH	0	57	0
pCSA110	1484	plus	CHH	0	40	0
pCSA110	1485	plus	CHH	0	40	0
pCSA110	1486	plus	CHG	0	40	0
pCSA110	1488	minus	CHG	3	57	0
pCSA110	1493	minus	CHH	0	57	0
pCSA110	1494	minus	CHH	0	57	0
pCSA110	1495	minus	CHH	0	57	0
pCSA110	1501	minus	CHH	1	57	0
pCSA110	1502	minus	CHH	1	57	0
pCSA110	1503	minus	CHH	0	57	0
pCSA110	1506	plus	CHH	0	40	0
pCSA110	1512	minus	CHH	0	57	0
pCSA110	1513	minus	CHH	0	57	0
pCSA110	1514	minus	CHH	0	57	0
pCSA110	1518	plus	CG	0	40	0
pCSA110	1519	minus	CG	2	57	0
pCSA110	1520	plus	CHH	0	40	0
pCSA110	1522	plus	CHH	0	40	0
pCSA110	1525	minus	CHH	0	57	0
pCSA110	1527	minus	CHH	0	57	0
pCSA110	1530	minus	CHH	1	57	0
pCSA110	1532	minus	CHH	0	57	0
pCSA110	1533	plus	CHH	0	40	0
pCSA110	1540	minus	CHH	1	57	0
pCSA110	1544	plus	CHH	0	40	0
pCSA110	1545	plus	CHH	0	40	0
pCSA110	1546	plus	CHH	0	40	0
pCSA110	1550	minus	CHH	0	57	0
pCSA110	1554	minus	CHH	1	57	0
pCSA110	1560	minus	CHH	0	57	0
pCSA110	1566	minus	CHH	0	57	0
pCSA110	1574	plus	CHH	0	38	0
pCSA110	1577	plus	CHH	0	36	0
pCSA110	1581	plus	CHH	0	33	0
pCSA110	1592	plus	CHH	0	23	0
pCSA110	1598	plus	CHH	0	17	0
pCSA110	1599	plus	CHH	0	16	0
pCSA110	1605	plus	CHH	0	12	0
pCSA110	1606	plus	CHH	0	12	0
pCSA110	1612	plus	CHH	0	8	0
pCSA110	1613	plus	CHG	0	7	0
pCSA110	1716	minus	CG	0	1	0
pCSA110	1717	plus	CHH	0	1	0
pCSA110	1719	plus	CHH	0	3	0
pCSA110	1721	plus	CHG	0	4	0
pCSA110	1723	minus	CHG	0	5	0
pCSA110	1724	minus	CHH	0	6	0
pCSA110	1725	plus	CHG	0	6	0
pCSA110	1726	plus	CG	0	7	0
pCSA110	1727	minus	CG	0	9	0
pCSA110	1729	plus	CG	0	9	0
pCSA110	1730	minus	CG	0	12	0
pCSA110	1736	plus	CHH	0	11	0
pCSA110	1739	plus	CG	0	13	0
pCSA110	1740	minus	CG	0	19	0
pCSA110	1742	plus	CG	0	14	0
pCSA110	1743	minus	CG	0	20	0
pCSA110	1745	minus	CHH	1	22	0
pCSA110	1747	plus	CHG	0	16	0
pCSA110	1749	minus	CHG	0	25	0
pCSA110	1750	minus	CHH	0	26	0
pCSA110	1751	minus	CHH	0	27	0
pCSA110	1756	plus	CHH	0	24	0
pCSA110	1757	plus	CHH	0	25	0
pCSA110	1758	plus	CHG	0	25	0
pCSA110	1760	minus	CHG	0	35	0
pCSA110	1761	minus	CHH	0	36	0
pCSA110	1762	plus	CG	0	27	0
pCSA110	1763	minus	CG	0	37	0
pCSA110	1767	plus	CHH	0	31	0
pCSA110	1768	plus	CHH	0	32	0
pCSA110	1769	plus	CHH	1	33	0
pCSA110	1772	plus	CHH	0	35	0
pCSA110	1778	plus	CG	0	40	0
pCSA110	1779	minus	CG	0	47	0
pCSA110	1780	plus	CHH	0	41	0
pCSA110	1781	plus	CHH	0	42	0
pCSA110	1784	minus	CHH	0	52	0
pCSA110	1785	plus	CHG	0	45	0
pCSA110	1787	minus	CHG	1	53	0
pCSA110	1788	plus	CHH	0	48	0
pCSA110	1790	plus	CHH	0	48	0
pCSA110	1793	plus	CHH	0	50	0
pCSA110	1794	plus	CHH	0	51	0
pCSA110	1795	plus	CHH	0	52	0
pCSA110	1796	plus	CHH	0	53	0
pCSA110	1797	plus	CHH	0	53	0
pCSA110	1801	plus	CG	0	56	0
pCSA110	1802	minus	CG	0	67	0
pCSA110	1803	plus	CHH	1	58	0
pCSA110	1804	plus	CHG	0	59	0
pCSA110	1806	minus	CHG	1	72	0
pCSA110	1807	plus	CHG	0	61	0
pCSA110	1809	minus	CHG	0	78	0
pCSA110	1810	minus	CHH	0	79	0
pCSA110	1811	plus	CG	0	64	0
pCSA110	1812	minus	CG	1	79	0
pCSA110	1818	minus	CHH	0	85	0
pCSA110	1819	plus	CG	0	68	0
pCSA110	1820	minus	CG	1	89	0
pCSA110	1823	minus	CHH	0	92	0
pCSA110	1825	minus	CHH	1	93	0
pCSA110	1826	minus	CHH	0	94	0
pCSA110	1827	plus	CHH	0	75	0
pCSA110	1828	plus	CHG	0	75	0
pCSA110	1829	plus	CG	0	75	0
pCSA110	1830	minus	CG	1	99	0
pCSA110	1831	plus	CHH	0	76	0
pCSA110	1833	plus	CHG	1	77	0
pCSA110	1834	plus	CG	2	78	0
pCSA110	1835	minus	CG	0	103	0
pCSA110	1838	plus	CG	0	82	0
pCSA110	1839	minus	CG	1	109	0
pCSA110	1840	plus	CHH	0	84	0
pCSA110	1841	plus	CHH	0	85	0
pCSA110	1842	plus	CHH	0	86	0
pCSA110	1845	plus	CHH	0	88	0
pCSA110	1846	plus	CHH	1	89	0
pCSA110	1847	plus	CHH	1	89	0
pCSA110	1850	plus	CHG	0	89	0
pCSA110	1852	minus	CHG	0	127	0
pCSA110	1855	minus	CHH	0	130	0
pCSA110	1856	plus	CG	0	90	0
pCSA110	1857	minus	CG	2	132	0
pCSA110	1858	plus	CHG	0	91	0
pCSA110	1860	minus	CHG	3	133	0
pCSA110	1861	plus	CHH	0	91	0
pCSA110	1862	plus	CHG	1	91	0
pCSA110	1864	minus	CHG	1	137	0
pCSA110	1868	minus	CHH	2	138	0
pCSA110	1869	minus	CHH	1	138	0
pCSA110	1870	plus	CG	0	88	0
pCSA110	1871	minus	CG	1	139	0
pCSA110	1875	minus	CHH	1	137	0
pCSA110	1876	minus	CHH	1	137	0
pCSA110	1877	minus	CHH	0	136	0
pCSA110	1879	plus	CG	0	86	0
pCSA110	1880	minus	CG	0	134	0
pCSA110	1881	plus	CG	0	85	0
pCSA110	1882	minus	CG	1	135	0
pCSA110	1883	plus	CHH	0	85	0
pCSA110	1884	plus	CHH	1	85	0
pCSA110	1885	plus	CHG	0	85	0
pCSA110	1887	minus	CHG	1	137	0
pCSA110	1890	minus	CHH	0	136	0
pCSA110	1891	plus	CG	1	81	0
pCSA110	1892	minus	CG	2	135	0
pCSA110	1893	minus	CHG	0	136	0
pCSA110	1894	plus	CG	0	81	0
pCSA110	1895	minus	CG	0	136	0
pCSA110	1896	plus	CHH	0	80	0
pCSA110	1902	minus	CHH	1	137	0
pCSA110	1903	plus	CG	0	75	0
pCSA110	1904	minus	CG	0	136	0
pCSA110	1905	plus	CG	0	73	0
pCSA110	1906	minus	CG	1	135	0
pCSA110	1907	minus	CHG	0	135	0
pCSA110	1908	plus	CG	0	70	0
pCSA110	1909	minus	CG	1	137	0
pCSA110	1910	minus	CHG	0	138	0
pCSA110	1911	minus	CHH	0	137	0
pCSA110	1913	minus	CHH	0	138	0
pCSA110	1915	minus	CHH	2	139	0
pCSA110	1916	minus	CHH	0	138	0
pCSA110	1918	minus	CHH	1	137	0
pCSA110	1919	minus	CHH	0	136	0
pCSA110	1923	plus	CG	0	60	0
pCSA110	1924	minus	CG	0	137	0
pCSA110	1925	plus	CG	0	58	0
pCSA110	1926	minus	CG	1	138	0
pCSA110	1927	plus	CHG	0	56	0
pCSA110	1929	minus	CHG	0	140	0
pCSA110	1930	plus	CG	0	54	0
pCSA110	1931	minus	CG	1	138	0
pCSA110	1933	minus	CHH	1	139	0
pCSA110	1935	plus	CHG	1	50	0
pCSA110	1936	plus	CG	0	49	0
pCSA110	1937	minus	CG	0	143	0
pCSA110	1938	plus	CHH	0	47	0
pCSA110	1941	plus	CHH	0	47	0
pCSA110	1943	plus	CHH	0	46	0
pCSA110	1946	minus	CHH	2	142	0
pCSA110	1947	plus	CHH	1	42	0
pCSA110	1948	plus	CHG	0	42	0
pCSA110	1950	minus	CHG	0	144	0
pCSA110	1951	plus	CG	0	40	0
pCSA110	1952	minus	CG	1	145	0
pCSA110	1953	plus	CHH	1	38	0
pCSA110	1954	plus	CHH	0	37	0
pCSA110	1955	plus	CHH	0	36	0
pCSA110	1958	minus	CHH	1	145	0
pCSA110	1959	plus	CG	0	33	0
pCSA110	1960	minus	CG	0	144	0
pCSA110	1961	plus	CHH	0	31	0
pCSA110	1962	plus	CHG	0	31	0
pCSA110	1963	plus	CG	0	30	0
pCSA110	1964	minus	CG	0	143	0
pCSA110	1965	plus	CHH	0	29	0
pCSA110	1967	plus	CHH	0	29	0
pCSA110	1968	plus	CHH	0	27	0
pCSA110	1972	plus	CG	0	25	0
pCSA110	1973	minus	CG	1	141	0
pCSA110	1974	plus	CHH	0	22	0
pCSA110	1978	plus	CHH	0	19	0
pCSA110	1981	plus	CHH	0	18	0
pCSA110	1982	plus	CHH	1	19	0
pCSA110	1983	plus	CHH	0	19	0
pCSA110	1986	plus	CHH	0	18	0
pCSA110	1987	plus	CHH	0	17	0
pCSA110	1991	plus	CHH	0	17	0
pCSA110	1993	plus	CG	0	15	0
pCSA110	1994	minus	CG	0	148	0
pCSA110	1995	plus	CHH	0	15	0
pCSA110	1996	plus	CHH	0	16	0
pCSA110	1998	plus	CG	0	17	0
pCSA110	1999	minus	CG	0	149	0
pCSA110	2002	plus	CG	0	19	0
pCSA110	2003	minus	CG	1	151	0
pCSA110	2004	plus	CHG	0	20	0
pCSA110	2005	plus	CG	0	19	0
pCSA110	2006	minus	CG	1	153	0
pCSA110	2007	minus	CHG	0	152	0
pCSA110	2008	plus	CHH	0	21	0
pCSA110	2012	plus	CHH	1	23	0
pCSA110	2013	plus	CHH	0	24	0
pCSA110	2014	plus	CHG	0	23	0
pCSA110	2015	plus	CG	0	24	0
pCSA110	2016	minus	CG	0	161	0
pCSA110	2018	plus	CHH	1	25	0
pCSA110	2021	minus	CHH	1	165	0
pCSA110	2022	plus	CHH	0	27	0
pCSA110	2024	plus	CHH	0	28	0
pCSA110	2030	plus	CG	1	33	0
pCSA110	2031	minus	CG	0	168	0
pCSA110	2032	minus	CHG	1	166	0
pCSA110	2033	minus	CHH	0	167	0
pCSA110	2034	minus	CHH	1	167	0
pCSA110	2035	minus	CHH	1	166	0
pCSA110	2036	plus	CHH	0	37	0
pCSA110	2038	plus	CHH	0	39	0
pCSA110	2039	plus	CHH	0	40	0
pCSA110	2040	plus	CHH	0	41	0
pCSA110	2045	minus	CHH	1	165	0
pCSA110	2046	minus	CHH	1	164	0
pCSA110	2047	minus	CHH	0	164	0
pCSA110	2050	plus	CHG	0	49	0
pCSA110	2051	plus	CG	0	50	0
pCSA110	2052	minus	CG	0	164	0
pCSA110	2058	minus	CHH	2	167	0
pCSA110	2060	minus	CHH	0	167	0
pCSA110	2061	plus	CHH	0	55	0
pCSA110	2066	plus	CG	0	58	0
pCSA110	2067	minus	CG	2	173	0
pCSA110	2068	minus	CHG	0	172	0
pCSA110	2069	plus	CHH	0	61	0
pCSA110	2071	plus	CHH	1	63	0
pCSA110	2072	plus	CHH	1	63	0
pCSA110	2074	plus	CG	0	64	0
pCSA110	2075	minus	CG	0	176	0
pCSA110	2077	plus	CHH	0	67	0
pCSA110	2078	plus	CHH	1	68	0
pCSA110	2079	plus	CHH	0	69	0
pCSA110	2080	plus	CHH	0	70	0
pCSA110	2087	plus	CHH	0	75	0
pCSA110	2090	minus	CHH	0	176	0
pCSA110	2095	minus	CHH	0	175	0
pCSA110	2096	minus	CHH	0	174	0
pCSA110	2097	minus	CHH	0	175	0
pCSA110	2099	minus	CHH	1	175	0
pCSA110	2102	minus	CHH	1	174	0
pCSA110	2103	minus	CHH	0	173	0
pCSA110	2106	plus	CHH	0	83	0
pCSA110	2108	plus	CG	0	83	0
pCSA110	2109	minus	CG	1	173	0
pCSA110	2112	minus	CHH	1	174	0
pCSA110	2114	minus	CHH	0	175	0
pCSA110	2115	minus	CHH	1	175	0
pCSA110	2116	minus	CHH	2	177	0
pCSA110	2117	plus	CHH	2	90	0
pCSA110	2118	plus	CHH	1	91	0
pCSA110	2121	plus	CG	1	91	0
pCSA110	2122	minus	CG	0	180	0
pCSA110	2123	plus	CHH	0	93	0
pCSA110	2124	plus	CHH	0	94	0
pCSA110	2125	plus	CHG	1	94	0
pCSA110	2127	minus	CHG	1	181	0
pCSA110	2131	minus	CHH	0	183	0
pCSA110	2133	plus	CG	0	97	0
pCSA110	2134	minus	CG	0	180	0
pCSA110	2135	minus	CHG	0	181	0
pCSA110	2141	plus	CG	0	96	0
pCSA110	2142	minus	CG	1	179	0
pCSA110	2143	plus	CHH	1	98	0
pCSA110	2144	plus	CHH	0	98	0
pCSA110	2145	plus	CHH	0	97	0
pCSA110	2149	minus	CHH	0	173	0
pCSA110	2151	plus	CG	0	97	0
pCSA110	2152	minus	CG	0	172	0
pCSA110	2155	minus	CHH	3	173	0
pCSA110	2156	minus	CHH	1	171	0
pCSA110	2158	minus	CHH	0	170	0
pCSA110	2160	plus	CHH	1	97	0
pCSA110	2161	plus	CHH	0	97	0
pCSA110	2163	plus	CG	0	98	0
pCSA110	2164	minus	CG	0	177	0
pCSA110	2167	plus	CHH	0	99	0
pCSA110	2175	minus	CHH	1	179	0
pCSA110	2177	minus	CHH	0	178	0
pCSA110	2178	minus	CHH	0	179	0
pCSA110	2180	plus	CHH	0	100	0
pCSA110	2182	plus	CHH	0	100	0
pCSA110	2185	minus	CHH	2	181	0
pCSA110	2188	plus	CHH	0	101	0
pCSA110	2189	plus	CHH	1	101	0
pCSA110	2193	plus	CHG	0	100	0
pCSA110	2195	minus	CHG	2	188	0
pCSA110	2196	minus	CHH	0	189	0
pCSA110	2199	plus	CHH	0	99	0
pCSA110	2202	plus	CHH	1	99	0
pCSA110	2204	plus	CHH	0	98	0
pCSA110	2206	plus	CHH	0	98	0
pCSA110	2209	plus	CHH	0	100	0
pCSA110	2210	plus	CHH	1	101	0
pCSA110	2211	plus	CHH	0	101	0
pCSA110	2215	plus	CHH	0	101	0
pCSA110	2217	plus	CG	0	101	0
pCSA110	2218	minus	CG	1	192	0
pCSA110	2219	minus	CHG	2	190	0
pCSA110	2221	plus	CHH	0	100	0
pCSA110	2226	plus	CHH	0	101	0
pCSA110	2231	minus	CHH	2	185	0
pCSA110	2240	minus	CHH	0	187	0
pCSA110	2241	minus	CHH	0	188	0
pCSA110	2242	minus	CHH	0	187	0
pCSA110	2248	minus	CHH	1	189	0
pCSA110	2249	plus	CHG	3	102	0
pCSA110	2250	plus	CG	0	103	0
pCSA110	2251	minus	CG	1	191	0
pCSA110	2256	plus	CG	1	105	0
pCSA110	2257	minus	CG	2	191	0
pCSA110	2258	minus	CHG	0	190	0
pCSA110	2259	plus	CHH	2	107	0
pCSA110	2260	plus	CHH	0	107	0
pCSA110	2265	minus	CHH	2	190	0
pCSA110	2266	minus	CHH	0	190	0
pCSA110	2276	minus	CHH	1	182	0
pCSA110	2278	minus	CHH	0	180	0
pCSA110	2279	plus	CHG	0	105	0
pCSA110	2281	minus	CHG	0	180	0
pCSA110	2288	plus	CHH	0	106	0
pCSA110	2299	plus	CG	0	110	0
pCSA110	2300	minus	CG	1	174	0
pCSA110	2301	plus	CG	3	110	0
pCSA110	2302	minus	CG	4	173	0
pCSA110	2311	plus	CHH	0	114	0
pCSA110	2322	plus	CG	1	116	0
pCSA110	2323	minus	CG	0	165	0
pCSA110	2324	plus	CHH	0	117	0
pCSA110	2328	plus	CHH	0	118	0
pCSA110	2335	minus	CHH	1	160	0
pCSA110	2336	minus	CHH	1	157	0
pCSA110	2338	minus	CHH	0	155	0
pCSA110	2339	minus	CHH	1	155	0
pCSA110	2340	plus	CHH	0	118	0
pCSA110	2342	plus	CHH	0	118	0
pCSA110	2347	plus	CG	7	117	0
pCSA110	2348	minus	CG	2	149	0
pCSA110	2349	minus	CHG	0	149	0
pCSA110	2350	minus	CHH	0	148	0
pCSA110	2351	minus	CHH	0	148	0
pCSA110	2356	minus	CHH	0	145	0
pCSA110	2358	minus	CHH	1	144	0
pCSA110	2359	plus	CG	8	117	1
pCSA110	2360	minus	CG	1	143	0
pCSA110	2361	plus	CG	12	117	1
pCSA110	2362	minus	CG	4	142	0
pCSA110	2363	minus	CHG	1	142	0
pCSA110	2366	plus	CHH	0	119	0
pCSA110	2367	plus	CHH	1	120	0
pCSA110	2368	plus	CHH	1	120	0
pCSA110	2369	plus	CHH	2	120	0
pCSA110	2375	minus	CHH	0	139	0
pCSA110	2385	plus	CHH	1	119	0
pCSA110	2392	plus	CHH	0	121	0
pCSA110	2396	plus	CHH	4	122	0
pCSA110	2403	minus	CHH	0	133	0
pCSA110	2407	plus	CHG	0	120	0
pCSA110	2408	plus	CG	0	120	0
pCSA110	2409	minus	CG	2	131	0
pCSA110	2410	plus	CHH	0	119	0
pCSA110	2412	plus	CHH	2	119	0
pCSA110	2415	minus	CHH	1	130	0
pCSA110	2417	minus	CHH	0	130	0
pCSA110	2419	plus	CHH	0	118	0
pCSA110	2425	plus	CHH	0	118	0
pCSA110	2426	plus	CHH	1	118	0
pCSA110	2427	plus	CHG	0	119	0
pCSA110	2429	minus	CHG	2	127	0
pCSA110	2436	minus	CHH	2	122	0
pCSA110	2437	plus	CHH	0	118	0
pCSA110	2440	plus	CHH	0	116	0
pCSA110	2450	minus	CHH	0	116	0
pCSA110	2456	minus	CHH	0	114	0
pCSA110	2457	minus	CHH	0	114	0
pCSA110	2460	minus	CHH	1	116	0
pCSA110	2462	minus	CHH	0	114	0
pCSA110	2466	minus	CHH	1	118	0
pCSA110	2468	minus	CHH	1	118	0
pCSA110	2473	plus	CHH	1	117	0
pCSA110	2476	plus	CHH	0	117	0
pCSA110	2481	plus	CHG	0	117	0
pCSA110	2482	plus	CG	0	117	0
pCSA110	2483	minus	CG	0	124	0
pCSA110	2485	minus	CHH	2	126	0
pCSA110	2487	plus	CG	0	118	0
pCSA110	2488	minus	CG	0	125	0
pCSA110	2489	plus	CHH	0	117	0
pCSA110	2490	plus	CHH	0	118	0
pCSA110	2491	plus	CHH	0	117	0
pCSA110	2497	plus	CHH	1	119	0
pCSA110	2498	plus	CHH	1	120	0
pCSA110	2499	plus	CHH	1	120	0
pCSA110	2506	minus	CHH	0	131	0
pCSA110	2507	plus	CG	1	118	0
pCSA110	2508	minus	CG	1	134	0
pCSA110	2509	minus	CHG	0	134	0
pCSA110	2510	plus	CHH	0	118	0
pCSA110	2516	minus	CHH	0	141	0
pCSA110	2517	plus	CHH	0	119	0
pCSA110	2518	plus	CHH	0	119	0
pCSA110	2521	plus	CHH	0	119	0
pCSA110	2522	plus	CHG	0	119	0
pCSA110	2524	minus	CHG	0	141	0
pCSA110	2530	minus	CHH	0	142	0
pCSA110	2531	plus	CHH	0	120	0
pCSA110	2533	plus	CHH	1	118	0
pCSA110	2535	plus	CHH	1	118	0
pCSA110	2536	plus	CHH	0	118	0
pCSA110	2537	plus	CHG	0	117	0
pCSA110	2539	minus	CHG	0	143	0
pCSA110	2543	plus	CG	1	118	0
pCSA110	2544	minus	CG	0	144	0
pCSA110	2545	plus	CHG	2	119	0
pCSA110	2547	minus	CHG	0	146	0
pCSA110	2548	minus	CHH	0	146	0
pCSA110	2550	minus	CHH	1	146	0
pCSA110	2554	minus	CHH	0	149	0
pCSA110	2560	minus	CHH	1	150	0
pCSA110	2563	minus	CHH	0	149	0
pCSA110	2564	plus	CHG	2	120	0
pCSA110	2566	minus	CHG	0	149	0
pCSA110	2569	minus	CHH	0	151	0
pCSA110	2572	plus	CHG	1	120	0
pCSA110	2574	minus	CHG	0	154	0
pCSA110	2577	minus	CHH	2	156	0
pCSA110	2578	minus	CHH	0	155	0
pCSA110	2579	minus	CHH	0	154	0
pCSA110	2581	minus	CHH	1	153	0
pCSA110	2582	plus	CHH	2	120	0
pCSA110	2584	plus	CG	1	120	0
pCSA110	2585	minus	CG	1	153	0
pCSA110	2587	minus	CHH	0	152	0
pCSA110	2589	minus	CHH	1	153	0
pCSA110	2590	minus	CHH	1	153	0
pCSA110	2591	minus	CHH	0	154	0
pCSA110	2595	plus	CHH	0	120	0
pCSA110	2598	plus	CG	1	121	0
pCSA110	2599	minus	CG	0	155	0
pCSA110	2602	plus	CHG	0	122	0
pCSA110	2604	minus	CHG	1	153	0
pCSA110	2605	minus	CHH	0	153	0
pCSA110	2608	plus	CHH	0	124	0
pCSA110	2610	plus	CHH	0	125	0
pCSA110	2613	plus	CHG	0	125	0
pCSA110	2615	minus	CHG	0	154	0
pCSA110	2616	plus	CG	0	123	0
pCSA110	2617	minus	CG	0	152	0
pCSA110	2618	minus	CHG	0	152	0
pCSA110	2622	minus	CHH	1	152	0
pCSA110	2625	plus	CHH	0	121	0
pCSA110	2626	plus	CHH	0	122	0
pCSA110	2629	minus	CHH	0	155	0
pCSA110	2631	minus	CHH	0	157	0
pCSA110	2633	minus	CHH	0	154	0
pCSA110	2638	plus	CG	0	120	0
pCSA110	2639	minus	CG	0	154	0
pCSA110	2640	plus	CHH	0	120	0
pCSA110	2641	plus	CHH	0	120	0
pCSA110	2642	plus	CHG	0	121	0
pCSA110	2643	plus	CG	1	121	0
pCSA110	2644	minus	CG	0	157	0
pCSA110	2647	minus	CHH	0	158	0
pCSA110	2650	plus	CG	1	120	0
pCSA110	2651	minus	CG	0	155	0
pCSA110	2656	plus	CHH	0	121	0
pCSA110	2657	plus	CHH	0	122	0
pCSA110	2661	minus	CHH	0	159	0
pCSA110	2664	minus	CHH	3	158	0
pCSA110	2666	minus	CHH	0	157	0
pCSA110	2667	plus	CHH	0	123	0
pCSA110	2669	plus	CHH	0	122	0
pCSA110	2677	minus	CHH	0	157	0
pCSA110	2680	plus	CHG	0	123	0
pCSA110	2682	minus	CHG	0	157	0
pCSA110	2683	plus	CHH	0	124	0
pCSA110	2687	minus	CHH	3	158	0
pCSA110	2689	minus	CHH	1	158	0
pCSA110	2690	minus	CHH	1	158	0
pCSA110	2691	plus	CG	0	124	0
pCSA110	2692	minus	CG	0	161	0
pCSA110	2693	plus	CG	0	124	0
pCSA110	2694	minus	CG	0	161	0
pCSA110	2695	minus	CHG	0	160	0
pCSA110	2702	plus	CHH	0	126	0
pCSA110	2703	plus	CHG	0	126	0
pCSA110	2704	plus	CG	0	126	0
pCSA110	2705	minus	CG	0	162	0
pCSA110	2710	minus	CHH	0	164	0
pCSA110	2712	plus	CG	0	126	0
pCSA110	2713	minus	CG	0	164	0
pCSA110	2714	plus	CHG	0	125	0
pCSA110	2715	plus	CG	2	126	0
pCSA110	2716	minus	CG	0	165	0
pCSA110	2717	minus	CHG	0	164	0
pCSA110	2718	minus	CHH	0	165	0
pCSA110	2719	plus	CHH	0	127	0
pCSA110	2722	minus	CHH	0	166	0
pCSA110	2724	minus	CHH	0	165	0
pCSA110	2725	plus	CHH	0	127	0
pCSA110	2728	plus	CHH	0	127	0
pCSA110	2730	plus	CG	0	126	0
pCSA110	2731	minus	CG	0	167	0
pCSA110	2732	minus	CHG	0	166	0
pCSA110	2734	plus	CG	0	127	0
pCSA110	2735	minus	CG	0	167	0
pCSA110	2736	plus	CHG	0	126	0
pCSA110	2737	plus	CG	1	126	0
pCSA110	2738	minus	CG	0	171	0
pCSA110	2739	plus	CHH	0	126	0
pCSA110	2743	plus	CHH	1	127	0
pCSA110	2745	plus	CHH	1	128	0
pCSA110	2750	plus	CHH	0	124	0
pCSA110	2752	plus	CHG	0	125	0
pCSA110	2754	minus	CHG	3	171	0
pCSA110	2758	minus	CHH	1	171	0
pCSA110	2760	plus	CHH	0	123	0
pCSA110	2763	minus	CHH	1	176	0
pCSA110	2764	minus	CHH	1	177	0
pCSA110	2767	minus	CHH	2	177	0
pCSA110	2769	minus	CHH	0	174	0
pCSA110	2772	plus	CHH	2	125	0
pCSA110	2774	plus	CHH	1	125	0
pCSA110	2776	plus	CHH	0	126	0
pCSA110	2777	plus	CHG	0	126	0
pCSA110	2779	minus	CHG	1	174	0
pCSA110	2781	plus	CHH	0	125	0
pCSA110	2783	plus	CHG	3	125	0
pCSA110	2785	minus	CHG	0	180	0
pCSA110	2790	minus	CHH	1	178	0
pCSA110	2791	plus	CHH	0	127	0
pCSA110	2794	plus	CHH	0	127	0
pCSA110	2798	plus	CG	1	126	0
pCSA110	2799	minus	CG	0	185	0
pCSA110	2800	minus	CHG	0	184	0
pCSA110	2803	minus	CHH	3	181	0
pCSA110	2804	minus	CHH	0	181	0
pCSA110	2805	plus	CHH	3	126	0
pCSA110	2808	minus	CHH	2	182	0
pCSA110	2810	plus	CHG	0	128	0
pCSA110	2812	minus	CHG	0	182	0
pCSA110	2816	minus	CHH	0	186	0
pCSA110	2818	minus	CHH	1	186	0
pCSA110	2825	minus	CHH	0	185	0
pCSA110	2826	plus	CHG	0	128	0
pCSA110	2828	minus	CHG	0	183	0
pCSA110	2830	minus	CHH	2	185	0
pCSA110	2831	plus	CHG	0	128	0
pCSA110	2833	minus	CHG	1	186	0
pCSA110	2834	plus	CHH	1	126	0
pCSA110	2835	plus	CHH	0	126	0
pCSA110	2840	plus	CHH	0	127	0
pCSA110	2841	plus	CHH	2	126	0
pCSA110	2844	minus	CHH	1	188	0
pCSA110	2846	minus	CHH	1	190	0
pCSA110	2848	minus	CHH	1	191	0
pCSA110	2853	plus	CHH	0	126	0
pCSA110	2855	plus	CHG	1	126	0
pCSA110	2857	minus	CHG	0	190	0
pCSA110	2858	plus	CG	0	122	0
pCSA110	2859	minus	CG	0	190	0
pCSA110	2860	minus	CHG	1	190	0
pCSA110	2861	plus	CHH	0	124	0
pCSA110	2862	plus	CHH	0	122	0
pCSA110	2865	plus	CHH	0	124	0
pCSA110	2869	plus	CHH	1	124	0
pCSA110	2872	plus	CHG	0	126	0
pCSA110	2874	minus	CHG	0	191	0
pCSA110	2876	plus	CHH	3	126	0
pCSA110	2879	plus	CG	1	127	0
pCSA110	2880	minus	CG	0	187	0
pCSA110	2883	plus	CG	0	127	0
pCSA110	2884	minus	CG	2	186	0
pCSA110	2885	minus	CHG	1	186	0
pCSA110	2887	minus	CHH	2	186	0
pCSA110	2888	minus	CHH	1	185	0
pCSA110	2890	plus	CHG	0	127	0
pCSA110	2891	plus	CG	1	127	0
pCSA110	2892	minus	CG	0	183	0
pCSA110	2895	minus	CHH	3	184	0
pCSA110	2896	minus	CHH	0	184	0
pCSA110	2898	minus	CHH	1	184	0
pCSA110	2899	plus	CHH	0	131	0
pCSA110	2903	plus	CHG	1	132	0
pCSA110	2904	plus	CG	0	132	0
pCSA110	2905	minus	CG	0	186	0
pCSA110	2906	plus	CHH	0	132	0
pCSA110	2913	minus	CHH	1	188	0
pCSA110	2914	plus	CHH	0	129	0
pCSA110	2916	plus	CHH	1	130	0
pCSA110	2919	plus	CHH	1	130	0
pCSA110	2922	minus	CHH	1	190	0
pCSA110	2923	minus	CHH	1	189	0
pCSA110	2924	minus	CHH	0	189	0
pCSA110	2925	minus	CHH	0	189	0
pCSA110	2926	minus	CHH	0	188	0
pCSA110	2929	plus	CHH	0	126	0
pCSA110	2932	minus	CHH	3	186	0
pCSA110	2936	plus	CHH	0	126	0
pCSA110	2938	plus	CG	1	126	0
pCSA110	2939	minus	CG	1	188	0
pCSA110	2940	plus	CHH	0	127	0
pCSA110	2941	plus	CHH	0	126	0
pCSA110	2944	minus	CHH	0	191	0
pCSA110	2947	plus	CG	0	126	0
pCSA110	2948	minus	CG	0	187	0
pCSA110	2951	minus	CHH	0	187	0
pCSA110	2952	minus	CHH	0	188	0
pCSA110	2953	minus	CHH	0	189	0
pCSA110	2956	plus	CHG	0	125	0
pCSA110	2957	plus	CG	0	124	0
pCSA110	2958	minus	CG	0	189	0
pCSA110	2959	minus	CHG	1	190	0
pCSA110	2961	minus	CHH	0	191	0
pCSA110	2962	plus	CHG	1	123	0
pCSA110	2964	minus	CHG	3	189	0
pCSA110	2968	minus	CHH	0	185	0
pCSA110	2971	minus	CHH	0	184	0
pCSA110	2972	plus	CHH	0	123	0
pCSA110	2973	plus	CHH	0	123	0
pCSA110	2977	plus	CHH	2	123	0
pCSA110	2978	plus	CHH	1	122	0
pCSA110	2982	plus	CG	0	122	0
pCSA110	2983	minus	CG	0	181	0
pCSA110	2985	plus	CG	0	122	0
pCSA110	2986	minus	CG	0	184	0
pCSA110	2988	minus	CHH	1	182	0
pCSA110	2989	plus	CG	0	122	0
pCSA110	2990	minus	CG	1	182	0
pCSA110	2992	minus	CHH	0	182	0
pCSA110	2994	plus	CHH	2	122	0
pCSA110	2996	plus	CHH	0	123	0
pCSA110	2997	plus	CHH	0	123	0
pCSA110	2999	plus	CG	2	122	0
pCSA110	3000	minus	CG	0	180	0
pCSA110	3003	minus	CHH	0	178	0
pCSA110	3004	plus	CHH	1	122	0
pCSA110	3005	plus	CHG	1	122	0
pCSA110	3007	minus	CHG	0	180	0
pCSA110	3010	minus	CHH	0	177	0
pCSA110	3011	plus	CHH	0	125	0
pCSA110	3015	minus	CHH	2	175	0
pCSA110	3016	minus	CHH	0	174	0
pCSA110	3017	plus	CHH	0	125	0
pCSA110	3020	plus	CHH	0	126	0
pCSA110	3023	plus	CG	0	127	0
pCSA110	3024	minus	CG	0	175	0
pCSA110	3027	minus	CHH	0	174	0
pCSA110	3028	plus	CG	1	127	0
pCSA110	3029	minus	CG	3	180	0
pCSA110	3030	plus	CHH	1	127	0
pCSA110	3034	plus	CHH	1	128	0
pCSA110	3041	plus	CHG	2	129	0
pCSA110	3043	minus	CHG	0	189	0
pCSA110	3044	minus	CHH	0	187	0
pCSA110	3045	plus	CG	0	126	0
pCSA110	3046	minus	CG	1	185	0
pCSA110	3049	plus	CHH	0	125	0
pCSA110	3052	plus	CHH	0	125	0
pCSA110	3056	plus	CHH	0	125	0
pCSA110	3058	plus	CHH	0	125	0
pCSA110	3061	minus	CHH	0	187	0
pCSA110	3062	plus	CHH	0	126	0
pCSA110	3065	plus	CHH	1	125	0
pCSA110	3066	plus	CHG	1	125	0
pCSA110	3067	plus	CG	0	125	0
pCSA110	3068	minus	CG	1	194	0
pCSA110	3069	minus	CHG	0	193	0
pCSA110	3070	plus	CHH	1	126	0
pCSA110	3073	plus	CHH	0	128	0
pCSA110	3082	minus	CHH	2	196	0
pCSA110	3084	plus	CHG	0	131	0
pCSA110	3086	minus	CHG	3	205	0
pCSA110	3087	minus	CHH	0	205	0
pCSA110	3090	minus	CHH	1	203	0
pCSA110	3091	minus	CHH	0	204	0
pCSA110	3093	minus	CHH	0	204	0
pCSA110	3094	minus	CHH	1	205	0
pCSA110	3095	plus	CG	2	129	0
pCSA110	3096	minus	CG	1	206	0
pCSA110	3097	minus	CHG	1	207	0
pCSA110	3103	minus	CHH	1	208	0
pCSA110	3106	minus	CHH	3	210	0
pCSA110	3107	plus	CHG	0	132	0
pCSA110	3109	minus	CHG	2	211	0
pCSA110	3110	minus	CHH	0	212	0
pCSA110	3112	plus	CHH	1	132	0
pCSA110	3113	plus	CHH	2	132	0
pCSA110	3115	plus	CHH	2	132	0
pCSA110	3118	plus	CHG	0	132	0
pCSA110	3120	minus	CHG	1	220	0
pCSA110	3121	plus	CG	0	130	0
pCSA110	3122	minus	CG	1	223	0
pCSA110	3123	plus	CHH	1	131	0
pCSA110	3125	plus	CG	0	132	0
pCSA110	3126	minus	CG	0	227	0
pCSA110	3127	minus	CHG	2	225	0
pCSA110	3128	plus	CHH	0	133	0
pCSA110	3129	plus	CHH	0	134	0
pCSA110	3130	plus	CHH	0	134	0
pCSA110	3133	plus	CHG	0	134	0
pCSA110	3134	plus	CG	0	134	0
pCSA110	3135	minus	CG	0	225	0
pCSA110	3136	minus	CHG	0	226	0
pCSA110	3137	plus	CHG	0	136	0
pCSA110	3139	minus	CHG	0	228	0
pCSA110	3140	minus	CHH	2	228	0
pCSA110	3141	plus	CHG	1	136	0
pCSA110	3143	minus	CHG	3	224	0
pCSA110	3144	minus	CHH	0	224	0
pCSA110	3151	minus	CHH	1	228	0
pCSA110	3152	plus	CHG	0	138	0
pCSA110	3154	minus	CHG	2	226	0
pCSA110	3161	plus	CHG	0	137	0
pCSA110	3163	minus	CHG	0	227	0
pCSA110	3164	minus	CHH	0	229	0
pCSA110	3166	minus	CHH	1	229	0
pCSA110	3167	plus	CHG	0	137	0
pCSA110	3168	plus	CG	1	138	0
pCSA110	3169	minus	CG	1	229	0
pCSA110	3170	minus	CHG	0	227	0
pCSA110	3172	minus	CHH	1	227	0
pCSA110	3174	minus	CHH	1	226	0
pCSA110	3175	plus	CG	2	136	0
pCSA110	3176	minus	CG	1	225	0
pCSA110	3178	minus	CHH	1	223	0
pCSA110	3179	minus	CHH	0	223	0
pCSA110	3180	minus	CHH	0	222	0
pCSA110	3182	plus	CHH	0	137	0
pCSA110	3184	plus	CG	0	137	0
pCSA110	3185	minus	CG	1	225	0
pCSA110	3186	plus	CG	0	137	0
pCSA110	3187	minus	CG	0	228	0
pCSA110	3188	minus	CHG	1	229	0
pCSA110	3192	plus	CHH	0	138	0
pCSA110	3196	minus	CHH	2	230	0
pCSA110	3197	plus	CHG	1	139	0
pCSA110	3199	minus	CHG	0	230	0
pCSA110	3200	plus	CHH	0	139	0
pCSA110	3202	plus	CHG	1	138	0
pCSA110	3204	minus	CHG	1	232	0
pCSA110	3205	minus	CHH	0	231	0
pCSA110	3206	minus	CHH	1	229	0
pCSA110	3207	minus	CHH	0	228	0
pCSA110	3208	plus	CHH	0	135	0
pCSA110	3209	plus	CHG	1	136	0
pCSA110	3211	minus	CHG	1	227	0
pCSA110	3214	minus	CHH	1	228	0
pCSA110	3215	minus	CHH	1	227	0
pCSA110	3219	minus	CHH	0	231	0
pCSA110	3220	plus	CHH	0	135	0
pCSA110	3221	plus	CHH	3	135	0
pCSA110	3222	plus	CHH	0	135	0
pCSA110	3224	plus	CHH	1	136	0
pCSA110	3225	plus	CHG	0	136	0
pCSA110	3226	plus	CG	0	136	0
pCSA110	3227	minus	CG	1	229	0
pCSA110	3231	plus	CG	1	136	0
pCSA110	3232	minus	CG	0	230	0
pCSA110	3235	minus	CHH	0	229	0
pCSA110	3240	plus	CHH	0	138	0
pCSA110	3243	plus	CHH	0	138	0
pCSA110	3245	plus	CG	1	138	0
pCSA110	3246	minus	CG	0	221	0
pCSA110	3248	plus	CG	0	137	0
pCSA110	3249	minus	CG	2	220	0
pCSA110	3250	minus	CHG	0	220	0
pCSA110	3251	minus	CHH	1	219	0
pCSA110	3252	minus	CHH	2	218	0
pCSA110	3254	minus	CHH	0	216	0
pCSA110	3256	plus	CHG	2	137	0
pCSA110	3258	minus	CHG	3	217	0
pCSA110	3259	minus	CHH	0	217	0
pCSA110	3260	plus	CHH	0	135	0
pCSA110	3263	plus	CHH	0	136	0
pCSA110	3267	minus	CHH	1	217	0
pCSA110	3268	minus	CHH	0	214	0
pCSA110	3271	minus	CHH	1	215	0
pCSA110	3274	plus	CG	1	136	0
pCSA110	3275	minus	CG	0	215	0
pCSA110	3281	minus	CHH	0	212	0
pCSA110	3283	plus	CHG	0	133	0
pCSA110	3285	minus	CHG	0	209	0
pCSA110	3288	plus	CG	0	134	0
pCSA110	3289	minus	CG	1	208	0
pCSA110	3290	plus	CHG	0	134	0
pCSA110	3292	minus	CHG	0	208	0
pCSA110	3294	minus	CHH	0	206	0
pCSA110	3298	minus	CHH	1	205	0
pCSA110	3299	minus	CHH	1	204	0
pCSA110	3301	minus	CHH	2	206	0
pCSA110	3302	plus	CHH	0	132	0
pCSA110	3303	plus	CHH	0	132	0
pCSA110	3305	plus	CHH	1	132	0
pCSA110	3307	plus	CHG	1	133	0
pCSA110	3309	minus	CHG	1	206	0
pCSA110	3315	minus	CHH	0	200	0
pCSA110	3316	plus	CHH	0	132	0
pCSA110	3320	minus	CHH	2	199	0
pCSA110	3321	minus	CHH	0	198	0
pCSA110	3325	plus	CHG	0	133	0
pCSA110	3327	minus	CHG	1	193	0
pCSA110	3329	plus	CHG	0	132	0
pCSA110	3331	minus	CHG	2	191	0
pCSA110	3333	plus	CHH	2	130	0
pCSA110	3334	plus	CHH	2	131	0
pCSA110	3337	minus	CHH	1	185	0
pCSA110	3342	plus	CHH	0	129	0
pCSA110	3344	plus	CHH	1	128	0
pCSA110	3352	plus	CHH	0	128	0
pCSA110	3357	minus	CHH	0	173	0
pCSA110	3361	minus	CHH	0	169	0
pCSA110	3370	plus	CHH	1	125	0
pCSA110	3373	plus	CHH	1	123	0
pCSA110	3389	minus	CHH	1	162	0
pCSA110	3390	minus	CHH	0	163	0
pCSA110	3393	plus	CHH	1	124	0
pCSA110	3396	minus	CHH	2	165	0
pCSA110	3397	minus	CHH	0	164	0
pCSA110	3399	minus	CHH	1	163	0
pCSA110	3402	minus	CHH	1	163	0
pCSA110	3405	plus	CHH	1	120	0
pCSA110	3406	plus	CHH	0	120	0
pCSA110	3412	minus	CHH	1	158	0
pCSA110	3418	plus	CHH	0	121	0
pCSA110	3420	plus	CHH	0	119	0
pCSA110	3423	minus	CHH	1	156	0
pCSA110	3425	plus	CHH	0	118	0
pCSA110	3426	plus	CHH	2	118	0
pCSA110	3432	plus	CHH	0	116	0
pCSA110	3433	plus	CHH	0	115	0
pCSA110	3434	plus	CHH	1	115	0
pCSA110	3439	plus	CG	0	114	0
pCSA110	3440	minus	CG	1	147	0
pCSA110	3442	minus	CHH	0	148	0
pCSA110	3444	minus	CHH	1	147	0
pCSA110	3449	plus	CG	0	112	0
pCSA110	3450	minus	CG	2	142	0
pCSA110	3453	plus	CHH	1	111	0
pCSA110	3454	plus	CHH	0	110	0
pCSA110	3456	plus	CHG	0	110	0
pCSA110	3458	minus	CHG	1	142	0
pCSA110	3460	minus	CHH	0	140	0
pCSA110	3461	plus	CG	0	108	0
pCSA110	3462	minus	CG	0	138	0
pCSA110	3464	plus	CHG	1	108	0
pCSA110	3466	minus	CHG	2	135	0
pCSA110	3468	plus	CHH	0	107	0
pCSA110	3469	plus	CHH	0	108	0
pCSA110	3470	plus	CHG	1	108	0
pCSA110	3471	plus	CG	0	108	0
pCSA110	3472	minus	CG	0	133	0
pCSA110	3475	minus	CHH	0	132	0
pCSA110	3480	minus	CHH	1	130	0
pCSA110	3483	plus	CHH	0	108	0
pCSA110	3487	minus	CHH	1	131	0
pCSA110	3488	minus	CHH	1	130	0
pCSA110	3491	plus	CHH	0	107	0
pCSA110	3494	plus	CHH	0	109	0
pCSA110	3497	minus	CHH	1	124	0
pCSA110	3499	minus	CHH	1	123	0
pCSA110	3502	plus	CHH	0	107	0
pCSA110	3503	plus	CHH	1	107	0
pCSA110	3511	plus	CHG	3	104	0
pCSA110	3513	minus	CHG	1	116	0
pCSA110	3514	plus	CG	2	105	0
pCSA110	3515	minus	CG	0	115	0
pCSA110	3516	plus	CG	2	107	0
pCSA110	3517	minus	CG	0	116	0
pCSA110	3522	plus	CHG	0	109	0
pCSA110	3524	minus	CHG	3	117	0
pCSA110	3525	plus	CHG	4	110	0
pCSA110	3527	minus	CHG	2	117	0
pCSA110	3528	plus	CHH	4	111	0
pCSA110	3531	minus	CHH	1	118	0
pCSA110	3532	plus	CHH	5	109	0
pCSA110	3536	plus	CHH	2	109	0
pCSA110	3544	plus	CHH	3	111	0
pCSA110	3545	plus	CHH	4	111	0
pCSA110	3547	plus	CHG	4	112	0
pCSA110	3548	plus	CG	7	113	0
pCSA110	3549	minus	CG	3	120	0
pCSA110	3550	plus	CHH	4	114	0
pCSA110	3553	plus	CHH	3	116	0
pCSA110	3554	plus	CHG	2	116	0
pCSA110	3556	minus	CHG	1	119	0
pCSA110	3557	plus	CG	6	116	0
pCSA110	3558	minus	CG	1	119	0
pCSA110	3559	minus	CHG	1	118	0
pCSA110	3561	minus	CHH	1	121	0
pCSA110	3562	minus	CHH	0	121	0
pCSA110	3566	minus	CHH	0	119	0
pCSA110	3570	minus	CHH	1	118	0
pCSA110	3571	plus	CHG	2	117	0
pCSA110	3572	plus	CG	2	117	0
pCSA110	3573	minus	CG	1	120	0
pCSA110	3574	minus	CHG	1	121	0
pCSA110	3577	plus	CHH	3	118	0
pCSA110	3580	minus	CHH	0	124	0
pCSA110	3582	minus	CHH	0	123	0
pCSA110	3583	plus	CHH	2	119	0
pCSA110	3586	plus	CHH	2	120	0
pCSA110	3587	plus	CHH	3	120	0
pCSA110	3590	plus	CHH	1	119	0
pCSA110	3592	plus	CHH	1	119	0
pCSA110	3598	plus	CHG	0	118	0
pCSA110	3599	plus	CG	0	119	0
pCSA110	3600	minus	CG	1	125	0
pCSA110	3603	minus	CHH	1	127	0
pCSA110	3604	minus	CHH	1	126	0
pCSA110	3608	plus	CHG	3	124	0
pCSA110	3610	minus	CHG	0	129	0
pCSA110	3611	minus	CHH	1	130	0
pCSA110	3612	plus	CHH	1	126	0
pCSA110	3615	plus	CHG	1	126	0
pCSA110	3617	minus	CHG	0	132	0
pCSA110	3618	plus	CHG	1	126	0
pCSA110	3620	minus	CHG	2	135	0
pCSA110	3622	minus	CHH	0	134	0
pCSA110	3623	plus	CG	1	126	0
pCSA110	3624	minus	CG	1	136	0
pCSA110	3625	plus	CHG	1	126	0
pCSA110	3627	minus	CHG	2	139	0
pCSA110	3631	plus	CHH	1	128	0
pCSA110	3632	plus	CHH	1	129	0
pCSA110	3638	plus	CHG	0	129	0
pCSA110	3640	minus	CHG	2	145	0
pCSA110	3642	plus	CHH	0	130	0
pCSA110	3643	plus	CHH	0	129	0
pCSA110	3646	plus	CHH	0	128	0
pCSA110	3649	minus	CHH	2	152	0
pCSA110	3651	minus	CHH	2	153	0
pCSA110	3654	minus	CHH	0	155	0
pCSA110	3655	plus	CHG	0	127	0
pCSA110	3656	plus	CG	0	127	0
pCSA110	3657	minus	CG	0	161	0
pCSA110	3660	minus	CHH	0	164	0
pCSA110	3664	minus	CHH	1	164	0
pCSA110	3665	minus	CHH	2	163	0
pCSA110	3666	plus	CHH	0	126	0
pCSA110	3667	plus	CHH	1	127	0
pCSA110	3669	plus	CHH	0	127	0
pCSA110	3670	plus	CHH	2	127	0
pCSA110	3672	plus	CHH	0	127	0
pCSA110	3675	plus	CHH	0	128	0
pCSA110	3678	minus	CHH	0	162	0
pCSA110	3681	plus	CHH	0	127	0
pCSA110	3683	plus	CHG	0	128	0
pCSA110	3685	minus	CHG	1	160	0
pCSA110	3688	minus	CHH	0	163	0
pCSA110	3689	plus	CHH	1	129	0
pCSA110	3691	plus	CHG	0	128	0
pCSA110	3692	plus	CG	0	128	0
pCSA110	3693	minus	CG	1	163	0
pCSA110	3694	plus	CHH	1	129	0
pCSA110	3695	plus	CHH	0	129	0
pCSA110	3698	plus	CHH	0	130	0
pCSA110	3702	plus	CHH	1	130	0
pCSA110	3703	plus	CHH	0	129	0
pCSA110	3705	plus	CG	0	129	0
pCSA110	3706	minus	CG	0	163	0
pCSA110	3707	plus	CHH	0	130	0
pCSA110	3709	plus	CHG	0	130	0
pCSA110	3711	minus	CHG	0	162	0
pCSA110	3712	plus	CHH	0	132	0
pCSA110	3717	plus	CHH	1	133	0
pCSA110	3718	plus	CHG	1	133	0
pCSA110	3720	minus	CHG	1	157	0
pCSA110	3724	plus	CHH	0	134	0
pCSA110	3725	plus	CHG	1	134	0
pCSA110	3727	minus	CHG	0	160	0
pCSA110	3729	minus	CHH	2	159	0
pCSA110	3730	minus	CHH	0	158	0
pCSA110	3731	plus	CHG	0	133	0
pCSA110	3733	minus	CHG	0	159	0
pCSA110	3734	plus	CHG	0	132	0
pCSA110	3736	minus	CHG	0	159	0
pCSA110	3737	plus	CHH	0	132	0
pCSA110	3738	plus	CHG	1	132	0
pCSA110	3740	minus	CHG	1	160	0
pCSA110	3742	minus	CHH	2	159	0
pCSA110	3743	minus	CHH	0	159	0
pCSA110	3744	plus	CG	2	133	0
pCSA110	3745	minus	CG	0	159	0
pCSA110	3750	minus	CHH	0	157	0
pCSA110	3752	plus	CG	1	130	0
pCSA110	3753	minus	CG	0	156	0
pCSA110	3755	minus	CHH	0	154	0
pCSA110	3757	plus	CHH	0	129	0
pCSA110	3761	plus	CHG	1	128	0
pCSA110	3762	plus	CG	2	127	0
pCSA110	3763	minus	CG	1	152	0
pCSA110	3764	minus	CHG	0	151	0
pCSA110	3765	minus	CHH	0	150	0
pCSA110	3768	minus	CHH	0	148	0
pCSA110	3769	minus	CHH	0	148	0
pCSA110	3771	plus	CHH	0	129	0
pCSA110	3773	plus	CHH	1	129	0
pCSA110	3776	minus	CHH	0	146	0
pCSA110	3778	plus	CG	2	127	0
pCSA110	3779	minus	CG	2	144	0
pCSA110	3783	minus	CHH	2	142	0
pCSA110	3787	plus	CHG	0	128	0
pCSA110	3788	plus	CG	0	128	0
pCSA110	3789	minus	CG	0	137	0
pCSA110	3790	minus	CHG	0	136	0
pCSA110	3795	minus	CHH	0	133	0
pCSA110	3796	minus	CHH	0	132	0
pCSA110	3797	plus	CG	0	127	0
pCSA110	3798	minus	CG	1	129	0
pCSA110	3799	plus	CHG	1	128	0
pCSA110	3801	minus	CHG	0	128	0
pCSA110	3802	plus	CG	0	126	0
pCSA110	3803	minus	CG	0	126	0
pCSA110	3804	minus	CHG	0	125	0
pCSA110	3806	plus	CG	0	126	0
pCSA110	3807	minus	CG	0	123	0
pCSA110	3808	minus	CHG	0	124	0
pCSA110	3809	minus	CHH	0	123	0
pCSA110	3810	plus	CHG	0	127	0
pCSA110	3812	minus	CHG	0	122	0
pCSA110	3815	plus	CG	1	126	0
pCSA110	3816	minus	CG	0	120	0
pCSA110	3817	minus	CHG	0	120	0
pCSA110	3818	minus	CHH	0	119	0
pCSA110	3819	minus	CHH	1	118	0
pCSA110	3820	minus	CHH	0	117	0
pCSA110	3821	minus	CHH	0	116	0
pCSA110	3824	plus	CG	0	121	0
pCSA110	3825	minus	CG	1	115	0
pCSA110	3827	minus	CHH	1	115	0
pCSA110	3828	plus	CHH	1	119	0
pCSA110	3830	plus	CHH	1	120	0
pCSA110	3832	plus	CHG	1	119	0
pCSA110	3834	minus	CHG	0	112	0
pCSA110	3835	plus	CHH	0	120	0
pCSA110	3836	plus	CHH	0	120	0
pCSA110	3837	plus	CHG	1	120	0
pCSA110	3839	minus	CHG	0	111	0
pCSA110	3840	plus	CHH	0	120	0
pCSA110	3843	minus	CHH	1	110	0
pCSA110	3844	minus	CHH	1	109	0
pCSA110	3846	minus	CHH	0	108	0
pCSA110	3847	plus	CG	1	121	0
pCSA110	3848	minus	CG	0	109	0
pCSA110	3851	plus	CG	0	122	0
pCSA110	3852	minus	CG	0	104	0
pCSA110	3854	plus	CHH	2	122	0
pCSA110	3855	plus	CHH	0	122	0
pCSA110	3858	plus	CHH	0	121	0
pCSA110	3860	plus	CHG	0	121	0
pCSA110	3861	plus	CG	0	121	0
pCSA110	3862	minus	CG	1	102	0
pCSA110	3865	plus	CHG	2	121	0
pCSA110	3867	minus	CHG	0	102	0
pCSA110	3869	minus	CHH	0	101	0
pCSA110	3873	plus	CHH	0	119	0
pCSA110	3874	plus	CHH	1	118	0
pCSA110	3877	plus	CHG	0	117	0
pCSA110	3879	minus	CHG	0	95	0
pCSA110	3880	plus	CG	0	119	0
pCSA110	3881	minus	CG	0	94	0
pCSA110	3883	minus	CHH	1	93	0
pCSA110	3885	minus	CHH	1	93	0
pCSA110	3886	plus	CHH	0	115	0
pCSA110	3890	minus	CHH	0	93	0
pCSA110	3892	minus	CHH	0	93	0
pCSA110	3896	minus	CHH	0	88	0
pCSA110	3897	plus	CG	0	116	0
pCSA110	3898	minus	CG	0	86	0
pCSA110	3899	plus	CHH	2	116	0
pCSA110	3900	plus	CHH	1	115	0
pCSA110	3902	plus	CG	0	116	0
pCSA110	3903	minus	CG	0	83	0
pCSA110	3904	plus	CHH	0	116	0
pCSA110	3907	plus	CHH	0	117	0
pCSA110	3908	plus	CHG	1	116	0
pCSA110	3909	plus	CG	0	116	0
pCSA110	3910	minus	CG	0	81	0
pCSA110	3913	minus	CHH	1	81	0
pCSA110	3914	minus	CHH	0	81	0
pCSA110	3915	minus	CHH	0	81	0
pCSA110	3917	minus	CHH	0	81	0
pCSA110	3921	minus	CHH	0	81	0
pCSA110	3922	minus	CHH	0	81	0
pCSA110	3923	plus	CG	0	113	0
pCSA110	3924	minus	CG	0	81	0
pCSA110	3925	minus	CHG	0	82	0
pCSA110	3927	plus	CHG	1	114	0
pCSA110	3929	minus	CHG	0	82	0
pCSA110	3930	minus	CHH	0	83	0
pCSA110	3934	plus	CHG	1	114	0
pCSA110	3935	plus	CG	3	113	0
pCSA110	3936	minus	CG	0	83	0
pCSA110	3937	minus	CHG	0	82	0
pCSA110	3941	minus	CHH	0	81	0
pCSA110	3942	plus	CG	0	111	0
pCSA110	3943	minus	CG	0	82	0
pCSA110	3944	minus	CHG	0	81	0
pCSA110	3945	plus	CHG	0	112	0
pCSA110	3947	minus	CHG	0	82	0
pCSA110	3948	minus	CHH	0	82	0
pCSA110	3949	minus	CHH	2	82	0
pCSA110	3951	plus	CG	0	112	0
pCSA110	3952	minus	CG	0	82	0
pCSA110	3953	minus	CHG	1	81	0
pCSA110	3956	plus	CHG	2	111	0
pCSA110	3958	minus	CHG	0	81	0
pCSA110	3959	minus	CHH	0	80	0
pCSA110	3961	minus	CHH	1	79	0
pCSA110	3963	minus	CHH	0	79	0
pCSA110	3964	plus	CG	0	111	0
pCSA110	3965	minus	CG	0	81	0
pCSA110	3966	plus	CHH	0	111	0
pCSA110	3968	plus	CG	0	111	0
pCSA110	3969	minus	CG	0	82	0
pCSA110	3971	minus	CHH	0	83	0
pCSA110	3972	minus	CHH	0	83	0
pCSA110	3973	minus	CHH	0	84	0
pCSA110	3975	minus	CHH	1	83	0
pCSA110	3976	plus	CHH	0	110	0
pCSA110	3979	plus	CHH	1	111	0
pCSA110	3980	plus	CHG	0	111	0
pCSA110	3982	minus	CHG	0	86	0
pCSA110	3983	minus	CHH	0	86	0
pCSA110	3984	minus	CHH	0	86	0
pCSA110	3985	minus	CHH	0	87	0
pCSA110	3986	minus	CHH	0	86	0
pCSA110	3990	plus	CG	0	109	0
pCSA110	3991	minus	CG	0	85	0
pCSA110	3992	plus	CHH	0	108	0
pCSA110	3993	plus	CHG	0	109	0
pCSA110	3995	minus	CHG	2	89	0
pCSA110	3996	minus	CHH	0	89	0
pCSA110	4000	plus	CHH	0	107	0
pCSA110	4007	minus	CHH	0	91	0
pCSA110	4009	plus	CHH	0	109	0
pCSA110	4010	plus	CHG	0	109	0
pCSA110	4012	minus	CHG	1	92	0
pCSA110	4014	plus	CG	1	109	0
pCSA110	4015	minus	CG	2	91	0
pCSA110	4016	minus	CHG	0	92	0
pCSA110	4017	minus	CHH	1	92	0
pCSA110	4021	plus	CG	2	108	0
pCSA110	4022	minus	CG	0	93	0
pCSA110	4023	plus	CHH	0	109	0
pCSA110	4024	plus	CHH	0	110	0
pCSA110	4026	plus	CHH	0	110	0
pCSA110	4027	plus	CHH	1	110	0
pCSA110	4029	plus	CHG	2	108	0
pCSA110	4031	minus	CHG	0	94	0
pCSA110	4033	plus	CHH	0	108	0
pCSA110	4036	minus	CHH	1	96	0
pCSA110	4038	minus	CHH	0	96	0
pCSA110	4039	plus	CG	2	110	0
pCSA110	4040	minus	CG	0	96	0
pCSA110	4042	plus	CG	1	110	0
pCSA110	4043	minus	CG	1	97	0
pCSA110	4050	minus	CHH	0	100	0
pCSA110	4052	minus	CHH	1	101	0
pCSA110	4055	minus	CHH	0	103	0
pCSA110	4056	plus	CHH	0	110	0
pCSA110	4058	plus	CG	1	109	0
pCSA110	4059	minus	CG	1	105	0
pCSA110	4061	plus	CHG	1	110	0
pCSA110	4063	minus	CHG	1	108	0
pCSA110	4064	minus	CHH	0	107	0
pCSA110	4065	minus	CHH	1	107	0
pCSA110	4066	minus	CHH	0	107	0
pCSA110	4067	minus	CHH	1	106	0
pCSA110	4068	minus	CHH	0	105	0
pCSA110	4069	plus	CG	0	109	0
pCSA110	4070	minus	CG	1	107	0
pCSA110	4071	minus	CHG	0	107	0
pCSA110	4073	minus	CHH	0	107	0
pCSA110	4074	plus	CHH	2	109	0
pCSA110	4075	plus	CHH	0	109	0
pCSA110	4079	minus	CHH	2	110	0
pCSA110	4080	minus	CHH	0	111	0
pCSA110	4086	plus	CG	0	106	0
pCSA110	4087	minus	CG	0	110	0
pCSA110	4088	plus	CHH	0	106	0
pCSA110	4089	plus	CHG	0	106	0
pCSA110	4091	minus	CHG	2	112	0
pCSA110	4092	plus	CHH	2	106	0
pCSA110	4095	plus	CG	0	106	0
pCSA110	4096	minus	CG	1	112	0
pCSA110	4097	plus	CG	1	105	0
pCSA110	4098	minus	CG	1	114	0
pCSA110	4099	minus	CHG	0	113	0
pCSA110	4100	plus	CHH	2	104	0
pCSA110	4101	plus	CHH	0	105	0
pCSA110	4108	plus	CG	0	107	0
pCSA110	4109	minus	CG	0	116	0
[truncated: 1,543 more rows]
